# Supplementary material for: Development and optimization of an ocular hydrogel adhesive patch using definitive screening design (DSD)
Source: Royal Society of Chemistry journal article supplement (doi:10.1039/d2bm01013e), 2022-10-20
Supplement: d2bm01013e14.pdf [file d2bm01013e14.pdf]

## Supporting Information

### Development and optimization of an ocular hydrogel adhesive patch using definitive screening design (DSD)

*Shima Gholizadeh<sup>1</sup>, Xi Chen<sup>1</sup>, Ann Yung<sup>2</sup>, Amirreza Naderi<sup>2</sup>, Mahsa Ghovvati<sup>1</sup>, Yangcheng Liu<sup>1</sup>, Ashkan Farzad<sup>3</sup>, Azadeh Mostafavi<sup>1</sup>, Reza Dana<sup>2</sup>, Nasim Annabi<sup>1</sup>*

<sup>1</sup>Chemical and Biomolecular Engineering Department, University of California - Los Angeles, Los Angeles, CA, USA

<sup>2</sup> Schepens Eye Research Institute, Mass Eye and Ear, Harvard Medical School, Department of Ophthalmology, Boston, MA, USA

<sup>3</sup>Sanquin product support and development, Sanquin plasma products B.V., Amsterdam, The Netherlands.

**Corresponding author:** Nasim Annabi ([nannabi@ucla.edu](mailto:nannabi@ucla.edu)), Tel: 310-267-5927

**Table S1.** Hydrogel compositions based on different concentrations of polymers used for Design of experiment (DoE) by JMP® software

| #  | GelMA <sup>1</sup><br>%(w/v) | Instagel <sup>2</sup><br>%(w/v) | PEGDA <sup>3</sup><br>%(w/v) | HAMA <sup>4</sup><br>%(w/v) | HAGM <sup>5</sup><br>%(w/v) | Replicates |
|----|------------------------------|---------------------------------|------------------------------|-----------------------------|-----------------------------|------------|
| 1  | 0                            | 0                               | 0                            | 0                           | 3                           | 2          |
| 2  | 0                            | 0                               | 0                            | 3                           | 0                           | 2          |
| 3  | 0                            | 0                               | 1                            | 0                           | 0                           | 2          |
| 4  | 0                            | 0                               | 1                            | 3                           | 0                           | 2          |
| 5  | 0                            | 3                               | 0                            | 0                           | 0                           | 2          |
| 6  | 0                            | 4                               | 1                            | 0                           | 3                           | 2          |
| 7  | 0                            | 6.5                             | 0.5                          | 1                           | 0                           | 2          |
| 8  | 0                            | 6.5                             | 1                            | 0                           | 0.5                         | 2          |
| 9  | 0                            | 7                               | 0                            | 0                           | 3                           | 2          |
| 10 | 0                            | 7                               | 0                            | 3                           | 0                           | 2          |
| 11 | 3                            | 0                               | 0                            | 0                           | 0                           | 2          |
| 12 | 4                            | 0                               | 1                            | 0                           | 3                           | 2          |
| 13 | 4                            | 0                               | 1                            | 3                           | 0                           | 2          |
| 14 | 6.5                          | 0                               | 0.5                          | 1                           | 0                           | 2          |
| 15 | 6.5                          | 0                               | 1                            | 0.5                         | 0                           | 2          |
| 16 | 7                            | 0                               | 0                            | 0                           | 3                           | 2          |
| 17 | 7                            | 0                               | 0                            | 1                           | 0                           | 2          |

<sup>1</sup>Referred to as GelMA B300, <sup>2</sup>Commercial name of GelMA B225, <sup>3</sup>Poly ethylene glycol diacrylate, <sup>4</sup>Methacrylated hyaluronic acid and <sup>5</sup>Glycidyl methacrylated hyaluronic acid.

**Table S2.** Physicochemical characteristics of single polymers 10% (w/v) for GelMA (B300 and B225), 3% (w/v) for HAMA and HAGM, and PEGDA.

| Polymer              | MW (kDa) <sup>1</sup>     | DM <sup>2</sup> |
|----------------------|---------------------------|-----------------|
| GelMA B300           | 60-100                    | 81%             |
| GelMA B225, Instagel | 40-60                     | 78%             |
| HAGM                 | 1.5-1.8 x 10 <sup>3</sup> | 12%             |
| HAMA                 | 1.5-1.8 x 10 <sup>3</sup> | 33%             |
| PEGDA                | 35 x 10 <sup>3</sup>      | 85%             |

<sup>1</sup>Molecular weight, <sup>2</sup>Degree of modification determined by <sup>1</sup>HNMR

**Table S3.** Optimized hydrogel formulations at different concentrations and weight ratios of GelMA B300 and HAGM.

| <b>#</b> | <b>Formulations</b> | <b>GelMA %(w/v)</b> | <b>HAGM %(w/v)</b> | <b>GelMA: HAGM ratio</b> |
|----------|---------------------|---------------------|--------------------|--------------------------|
| <b>1</b> | G7HG3               | 7                   | 3                  | 2.3                      |
| <b>2</b> | G14HG3              | 14                  | 3                  | 4.7                      |
| <b>3</b> | G14HG6              | 14                  | 6                  | 2.3                      |
| <b>4</b> | G7HG6               | 7                   | 6                  | 1.2                      |

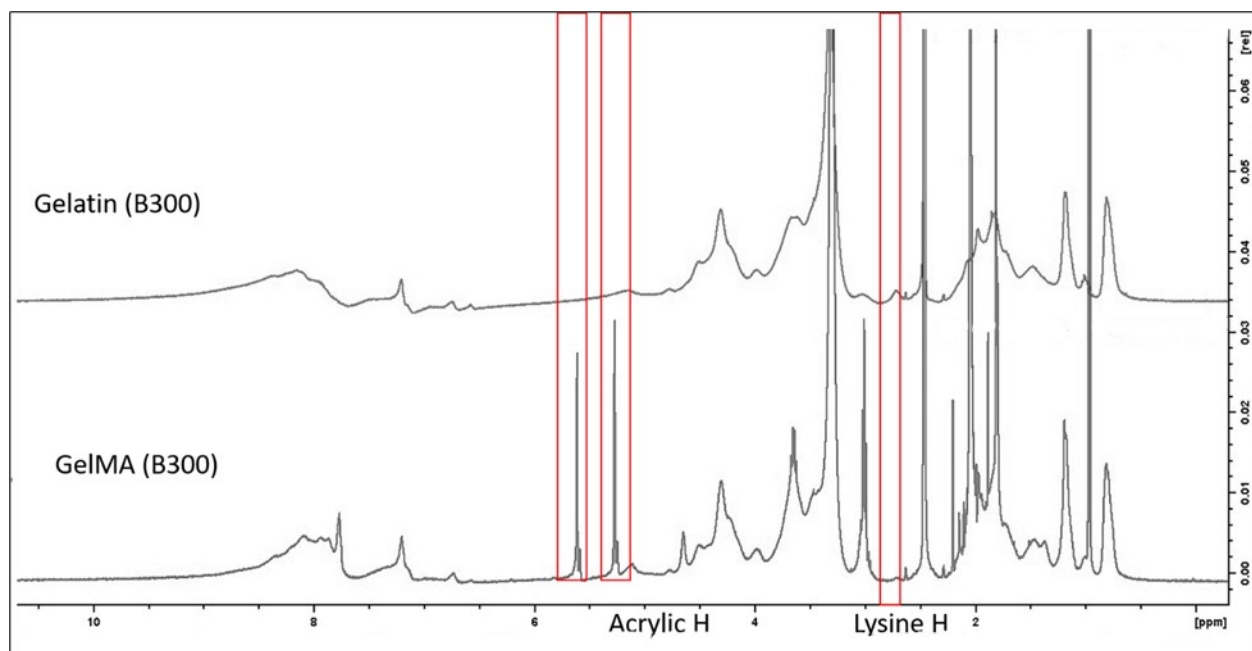

**Figure S1.** <sup>1</sup>H NMR characterization of porcine derived methacrylated gelatin (GelMA B300) compared to its native form gelatin (B300).

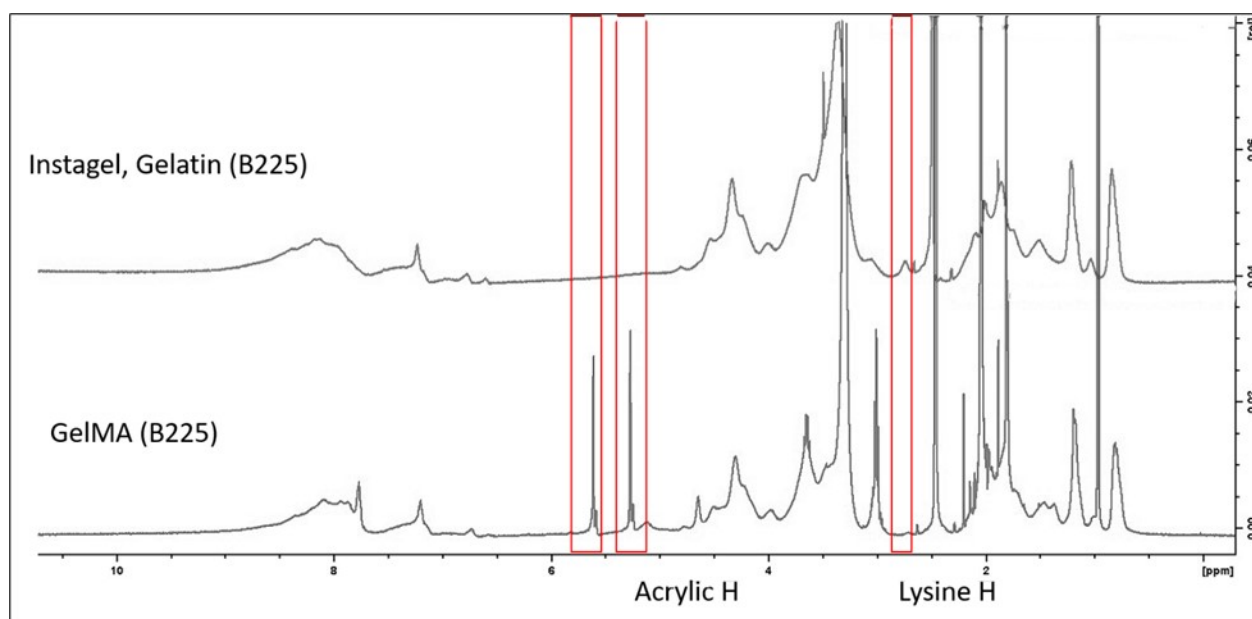

**Figure S2.** <sup>1</sup>H NMR characterization of porcine derived methacrylated gelatin (GelMA B225) compared to its native form gelatin (B225) or Instagel.

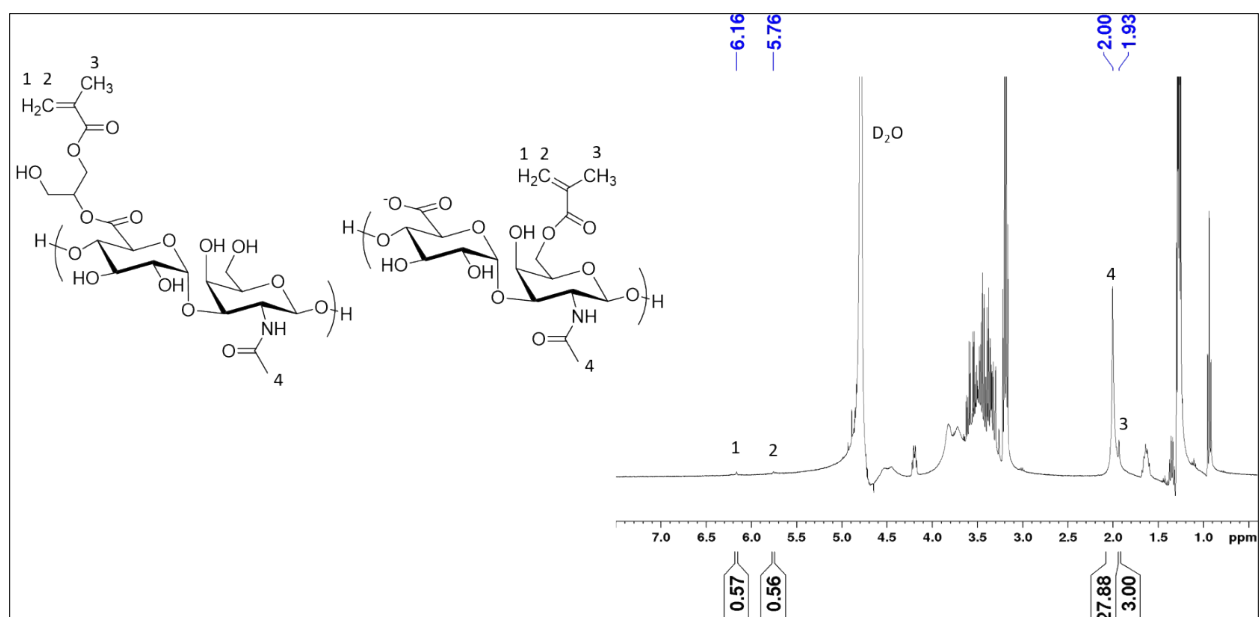

**Figure S3.**  $^1\text{H}$ NMR characterization of glycidyl methacrylated hyaluronic acid (HAGM).

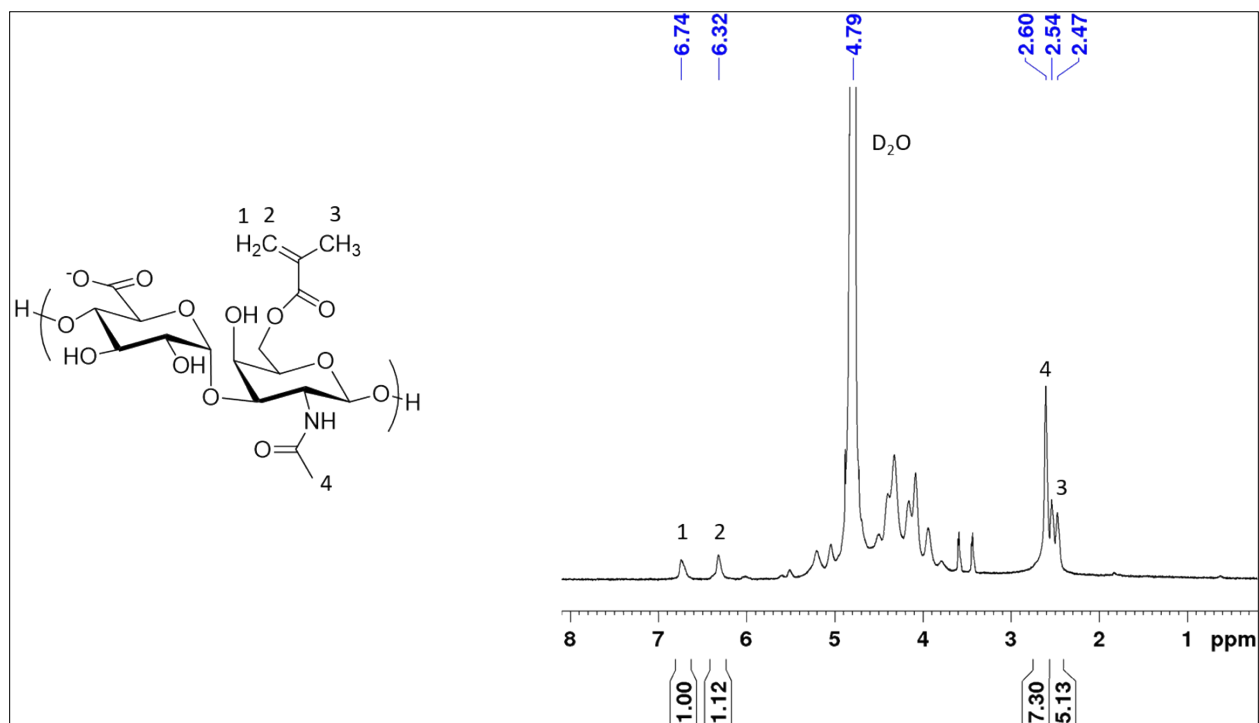

**Figure S4.**  $^1\text{H}$ NMR characterization of methacrylated hyaluronic acid (HAMA).

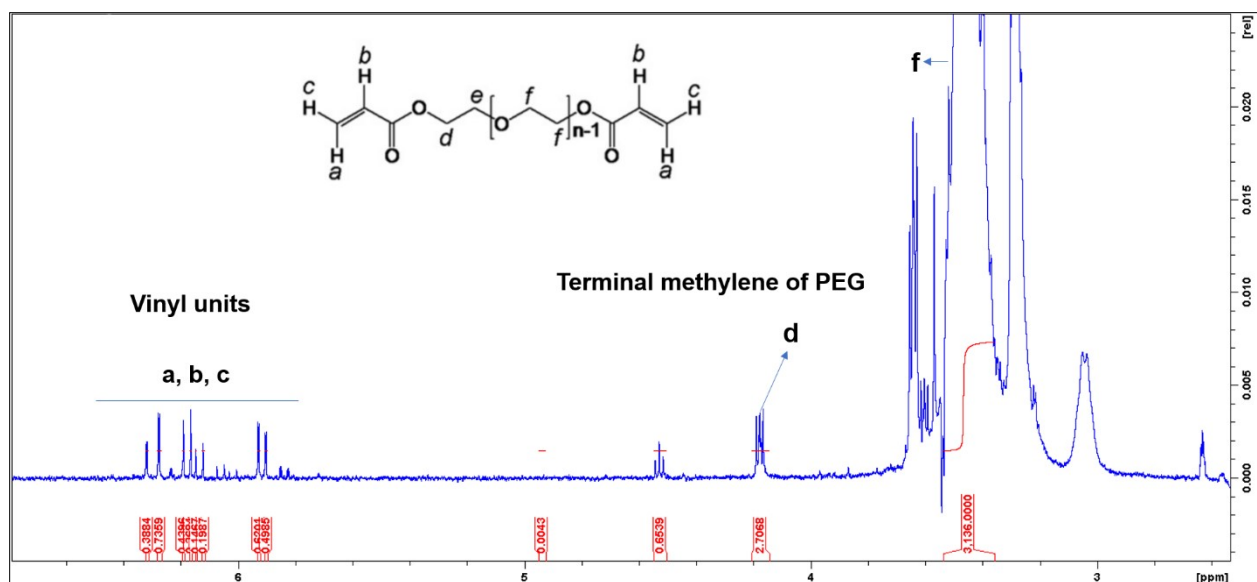

**Figure S5.**  $^1\text{H}$ NMR characterization of diacrylated polyethylene glycol (PEGDA)

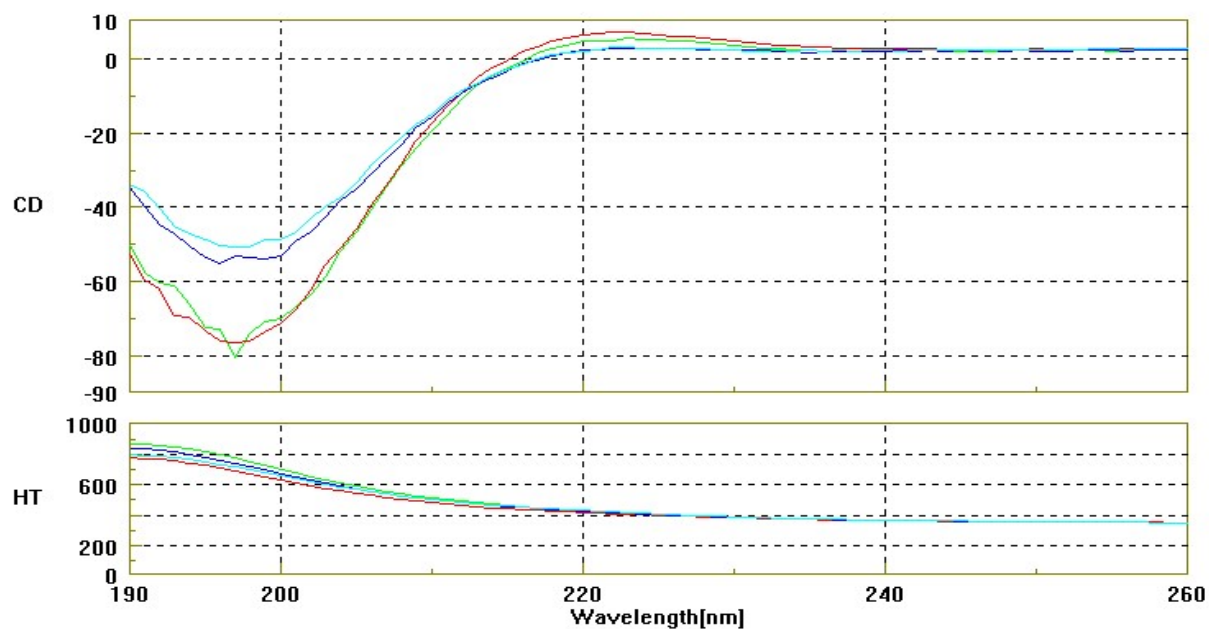

**Figure S6.** Circular dichroism (CD) spectra of 0.03% GelMA B300 (blue), GelMA B225 (cyan), [orcine gelatin B300 (red), and porcine gelatin B225 (green) dissolved in water. The bottom half is dynode voltage, labeled as high tension (HT).

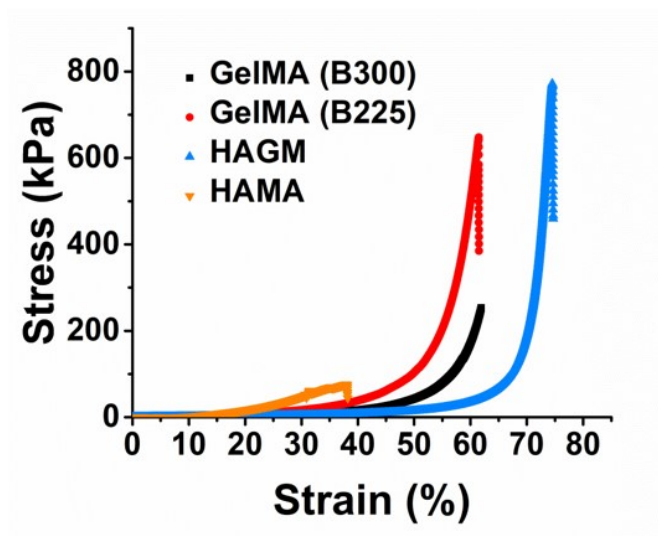

**Figure S7.** Representative compressive stress-strain curves of photocrosslinked hydrogels prepared with 10% (w/v) GeIMA (300 and 225) and 3% (w/v) HAGMA and HAMA.

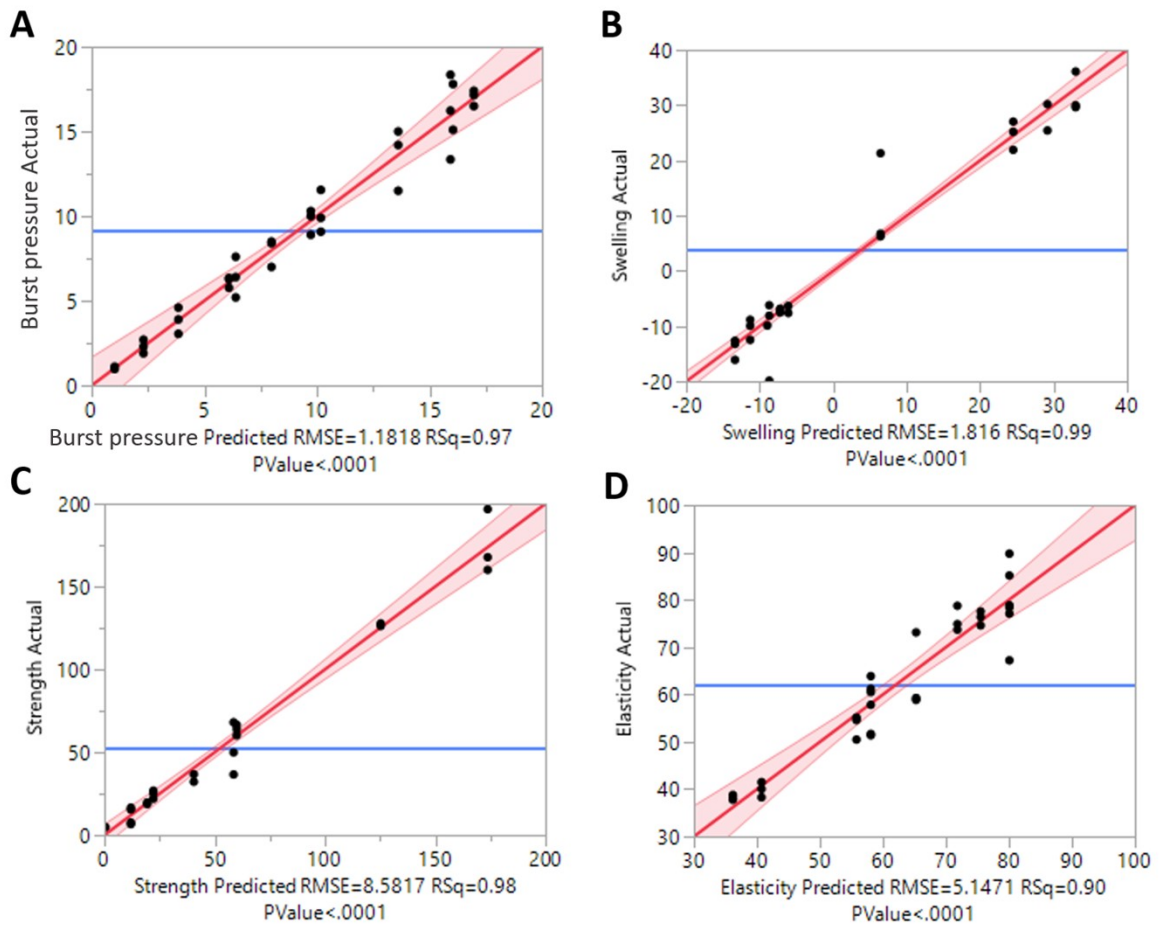

**Figure S8.** Scatterplots of experimental versus predicted values for (A) Burst pressure, (B) Swelling ratio, (C) compression modulus, and (D) Elasticity.



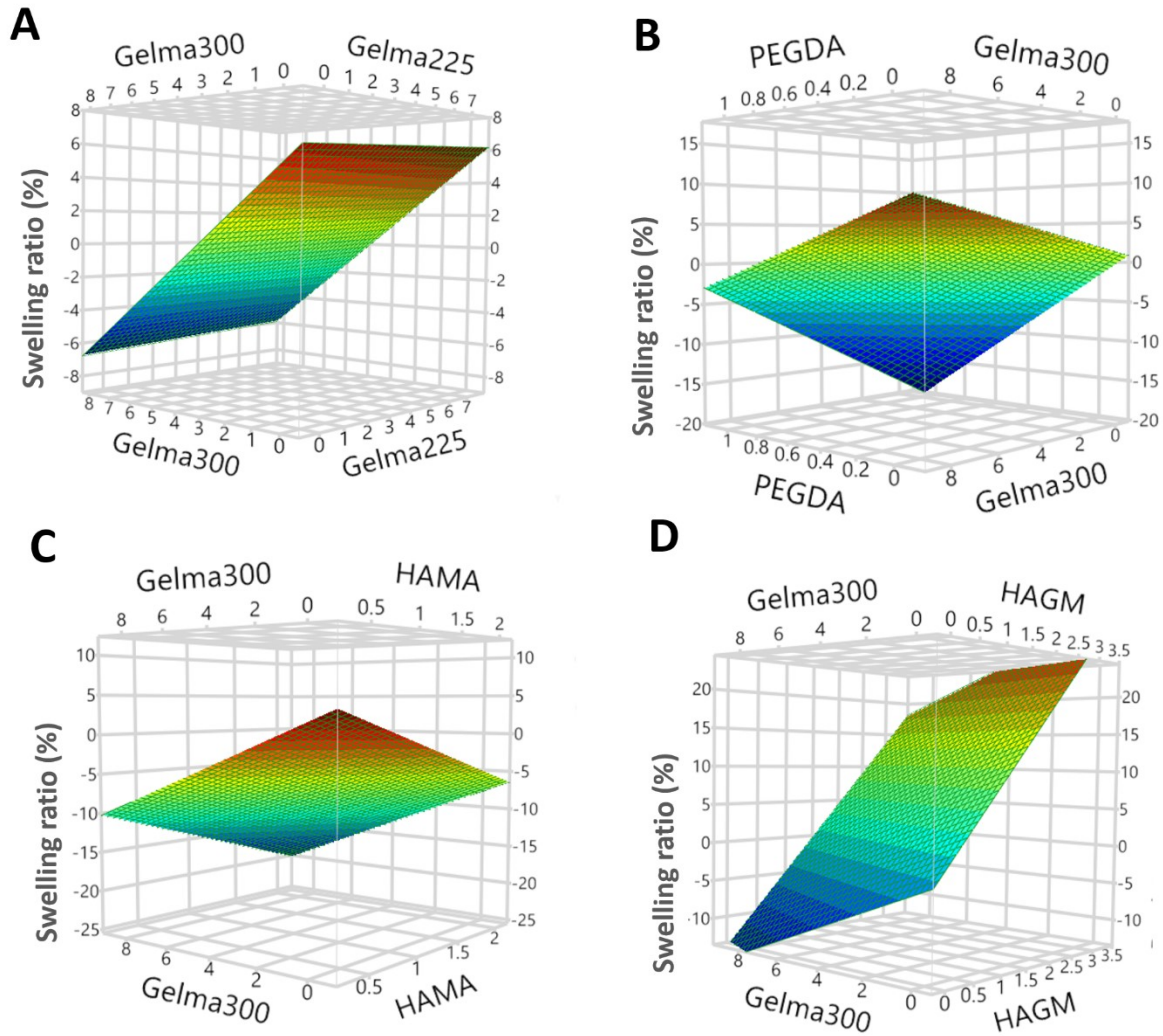

**Figure S9. Response surface estimated by definitive screening design (DSD) for swelling ratio.** (A) As a function of GelMA B300 and GelMA B225 concentrations, (B) as a function of GelMA B300 and PEGDA concentrations, (C) as a function of HAMA and GelMA B300 concentrations, (D) as a function of GelMA B300 of HAGM concentrations. Only positive Z values were considered.

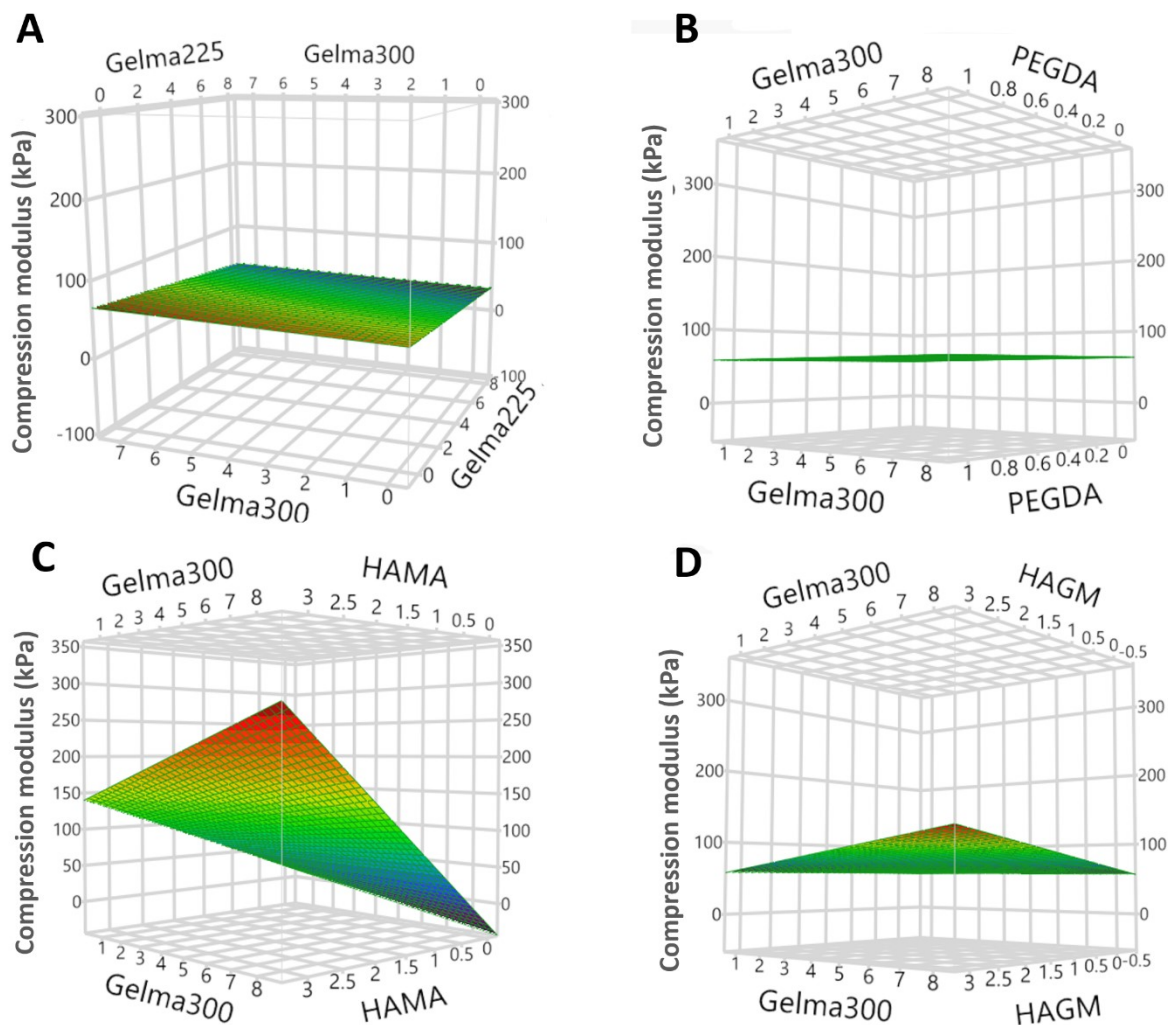

**Figure S10. Response surface estimated by definitive screening design (DSD) for compression modulus.** (A) As a function of GelMA B300 and GelMA B225 concentrations, (B) as a function of GelMA B300 and PEGDA concentrations, (C) as a function of GelMA B300 and HAMA concentrations, (D) and as a function of GelMA B300 of HAGM concentrations. Only positive Z values were considered.

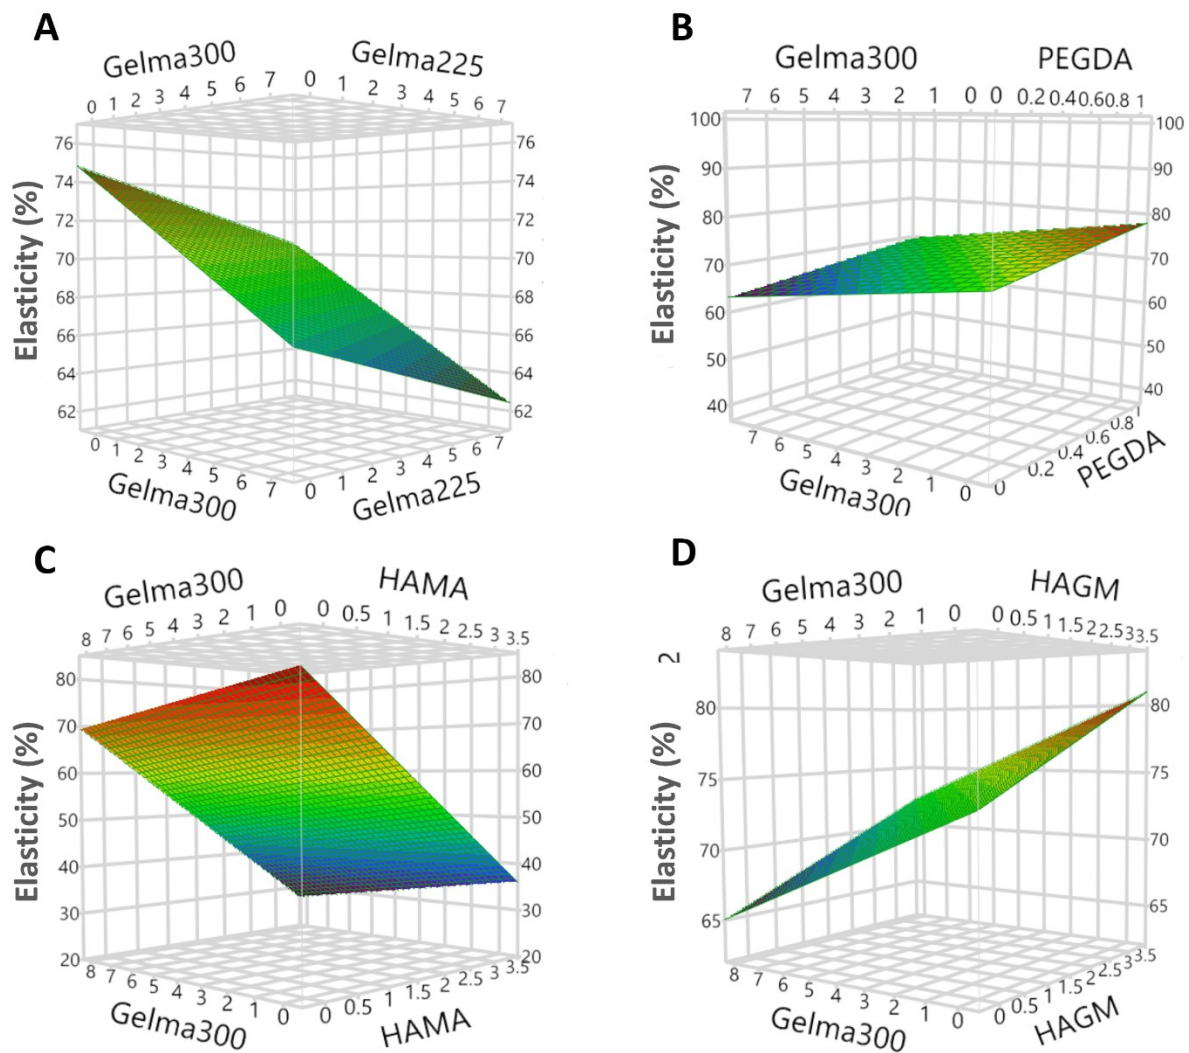

**Figure S11. Response surface estimated by definitive screening design (DSD) for elasticity (maximum strain).** (A) As a function of GelMA B300 and GelMA B225 concentrations, (B) as a function of GelMA B300 and PEGDA concentrations, (C) as a function of GelMA B300 and HAMA concentrations, and (D) as a function of GelMA B300 of HAGM concentrations. Only positive Z values were considered.

Figure S12. Characterization of GelPatches formulations

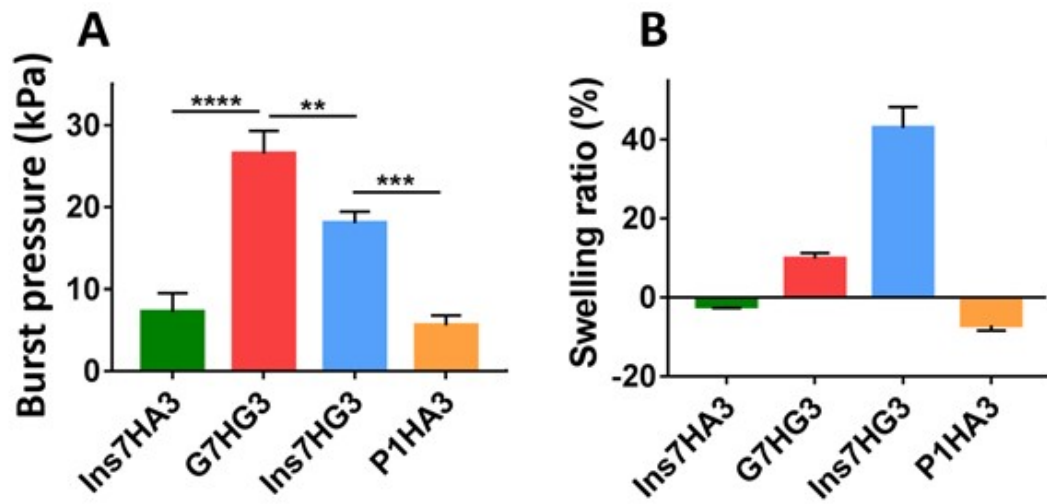

suggested by augmented design of JMP® software. (A) Burst pressure measured using collagen sheets and (B) swelling ratios of various formulations in DPBS at 37°C.

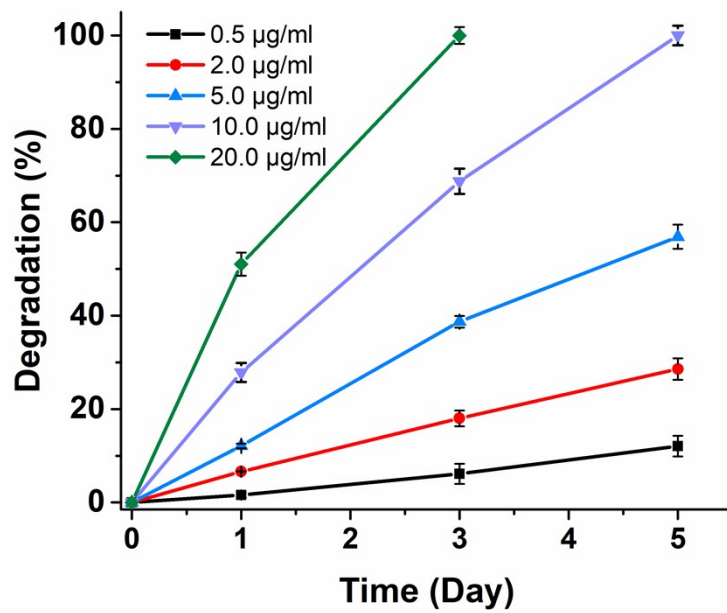

**Figure S13.** *In vitro* degradation of optimized GelPatch formulation (G7HG3) in the presence of various concentrations of collagenase type II and Hyaluronidase (type I-S) in DPBS and 37°C. Data are represented as mean  $\pm$  SD, n =3.

**Movie S1.** (.mp4 format). This movie shows the *ex vivo* adhesion and retention of the optimized GelPatch formulation (G7HG3) to the scleral ocular surface after 4 days of incubation in organ bath.

**Movie S2.** (.mp4 format). This movie shows *ex vivo* adhesion and retention of the optimized GelPatch formulation (G7HG3) upon subconjunctival injection and crosslinking after 4 days of incubation in organ bath.
