# Supplementary figures and images for: Development and optimization of an ocular hydrogel adhesive patch using definitive screening design (DSD)
Source: Royal Society of Chemistry journal article supplement (doi:10.1039/d2bm01013e), 2022-10-20

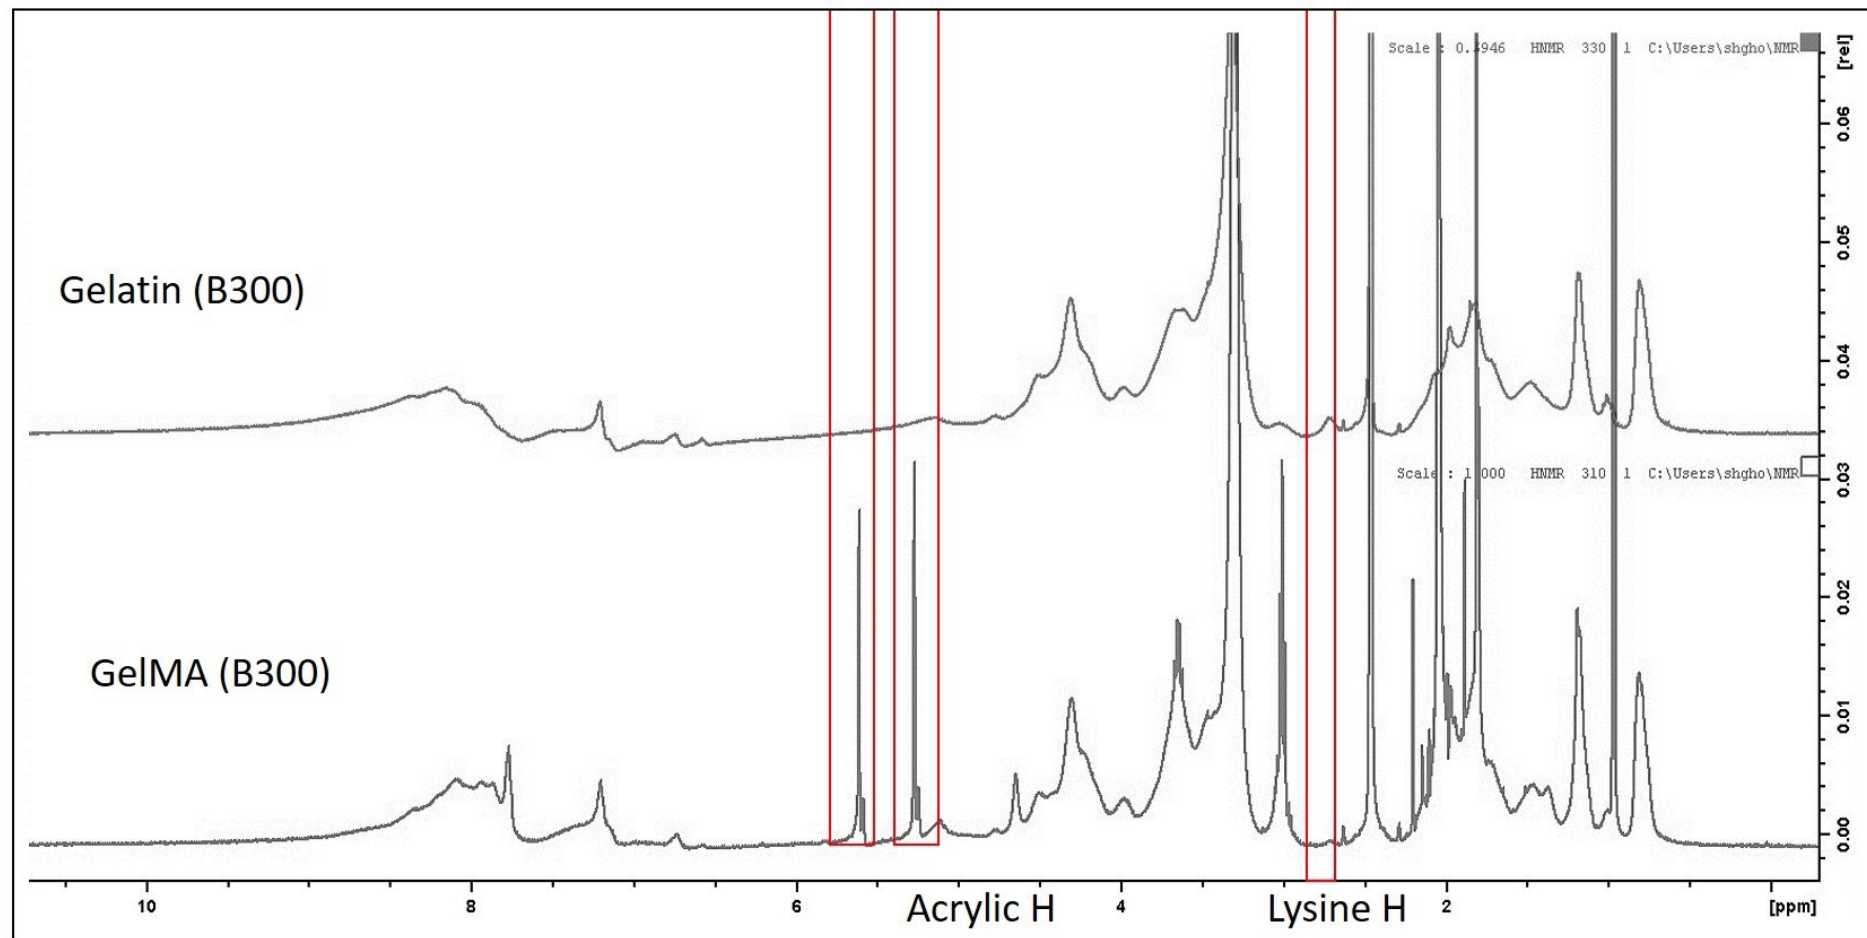

Supplement: d2bm01013e1.pdf [file d2bm01013e1.pdf]

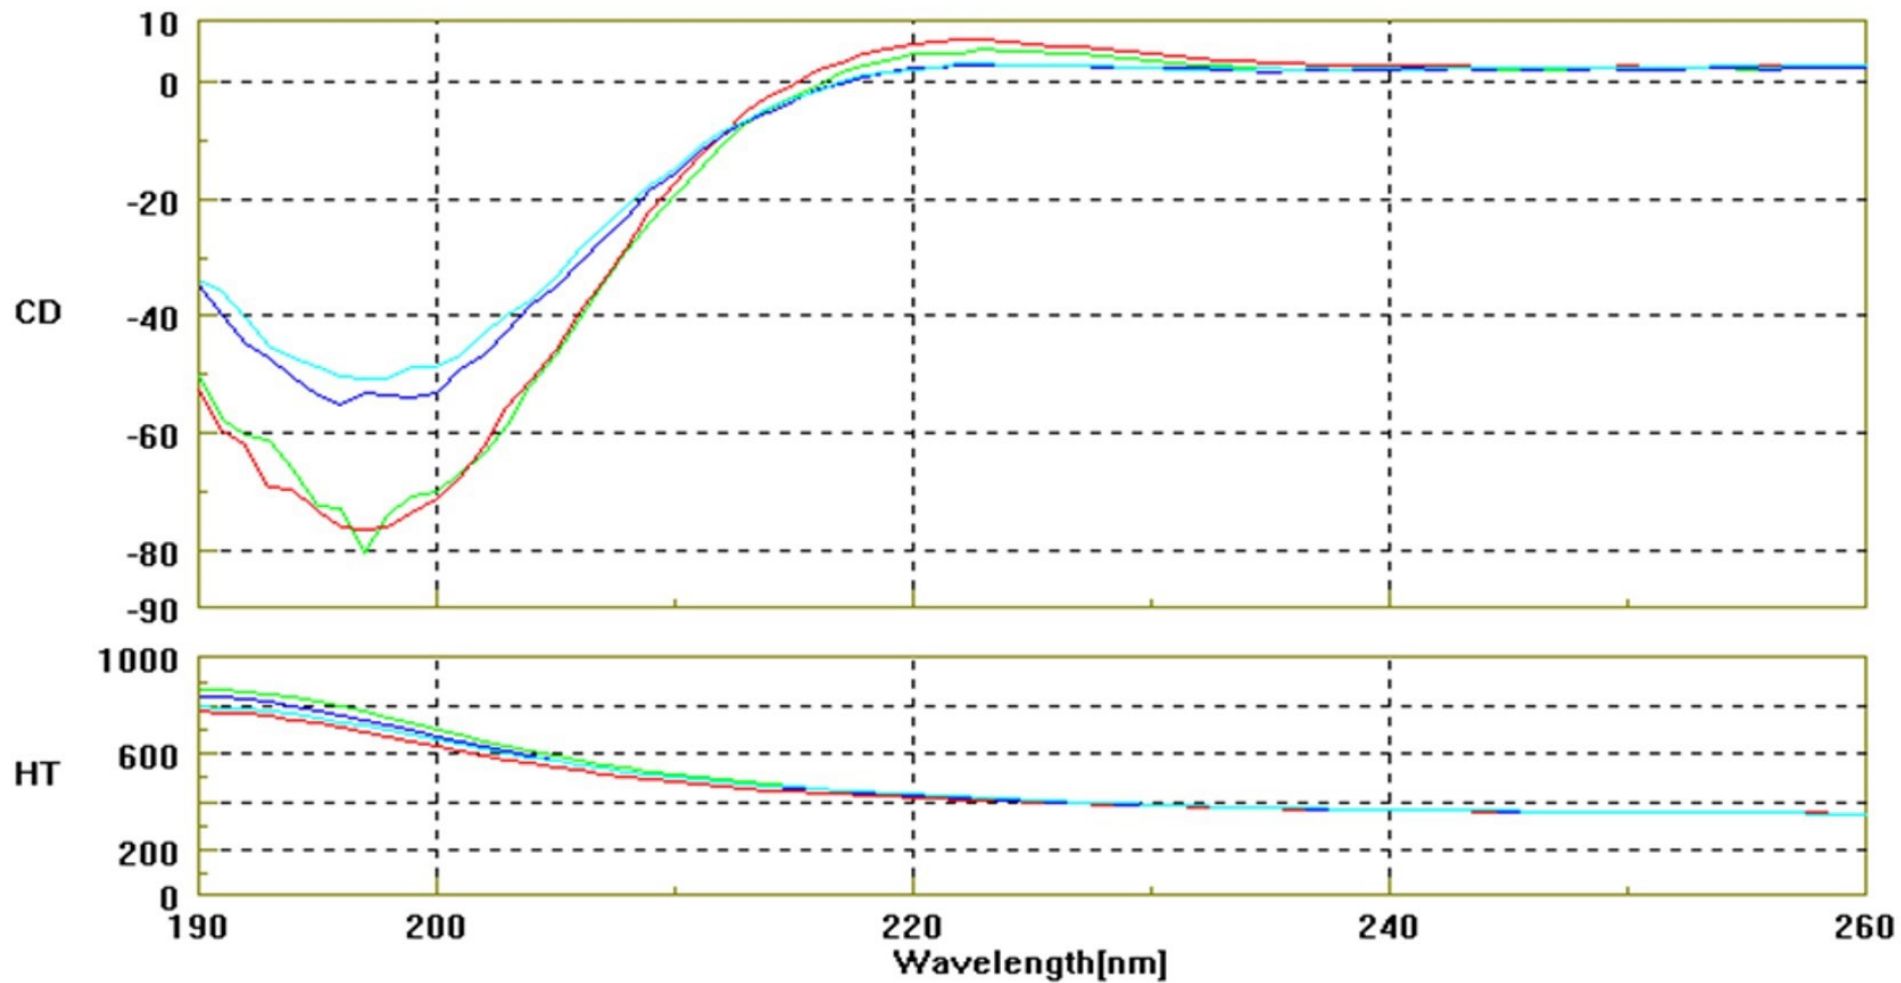

Supplement: d2bm01013e10.pdf [file d2bm01013e10.pdf]

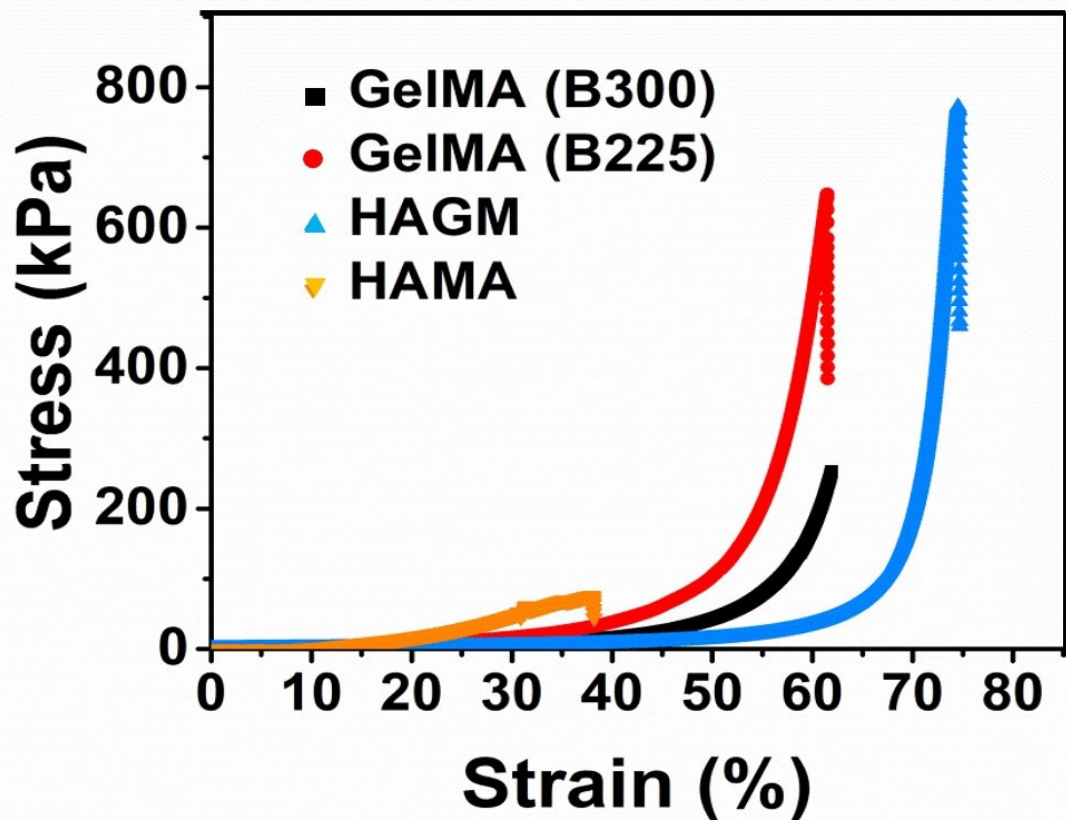

Supplement: d2bm01013e11.pdf [file d2bm01013e11.pdf]

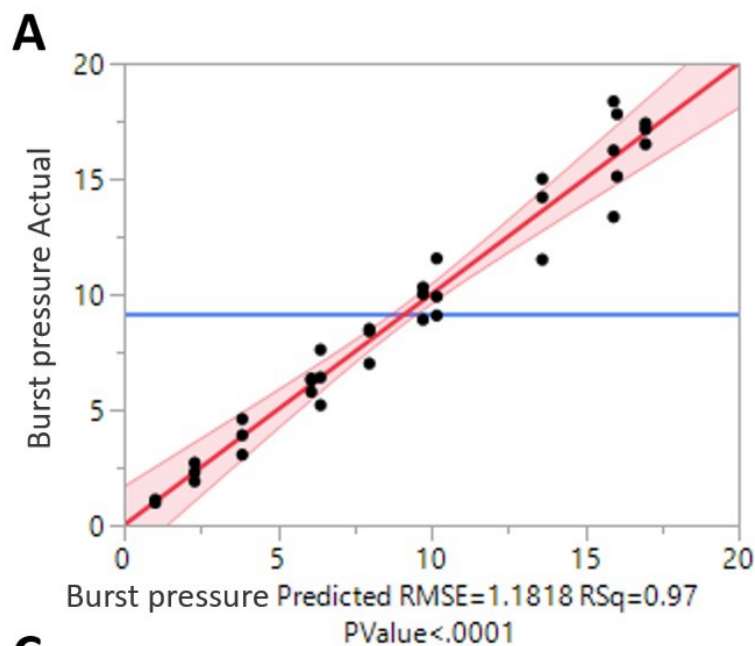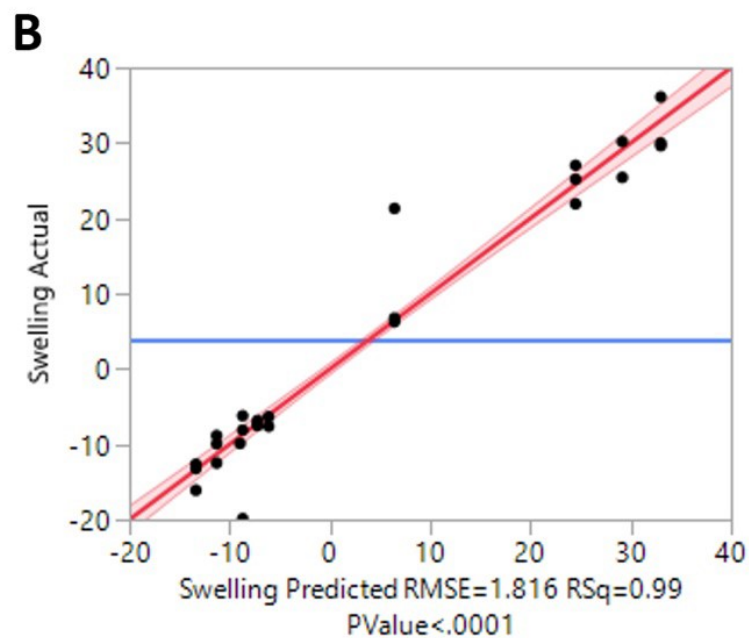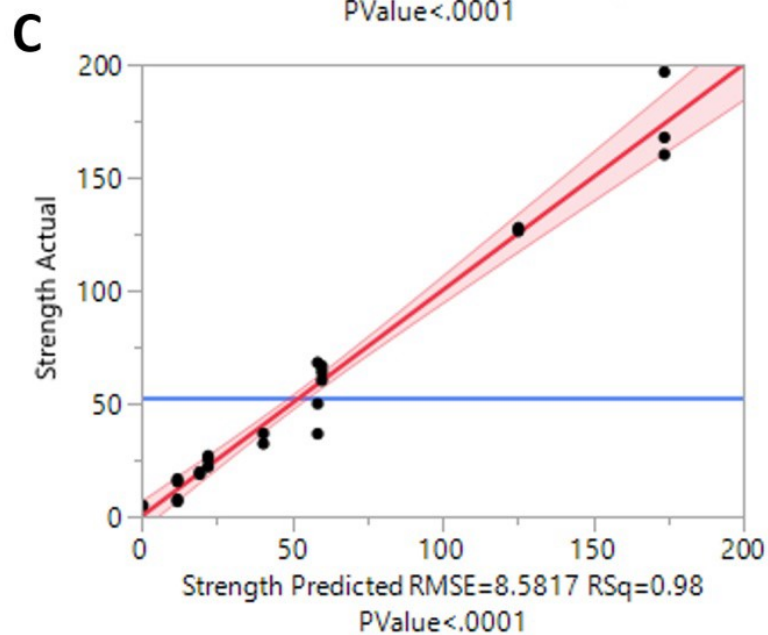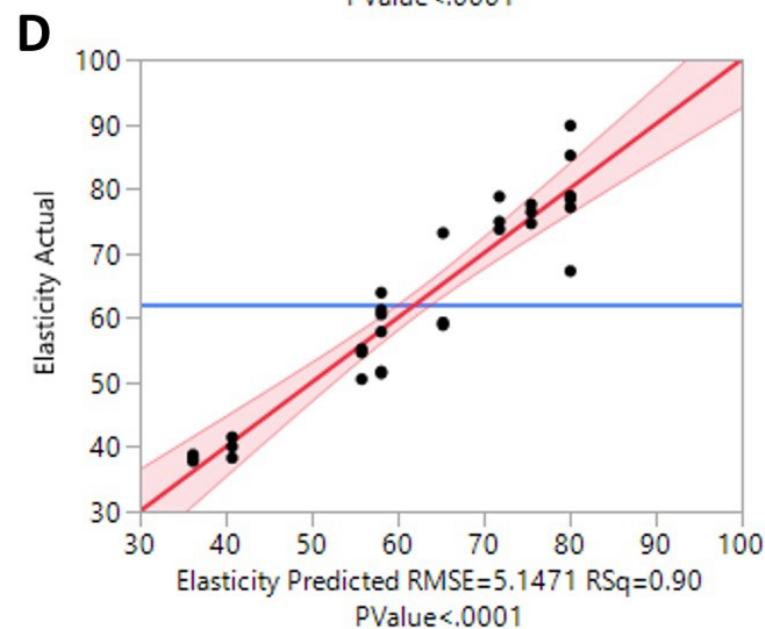

Supplement: d2bm01013e12.pdf [file d2bm01013e12.pdf]

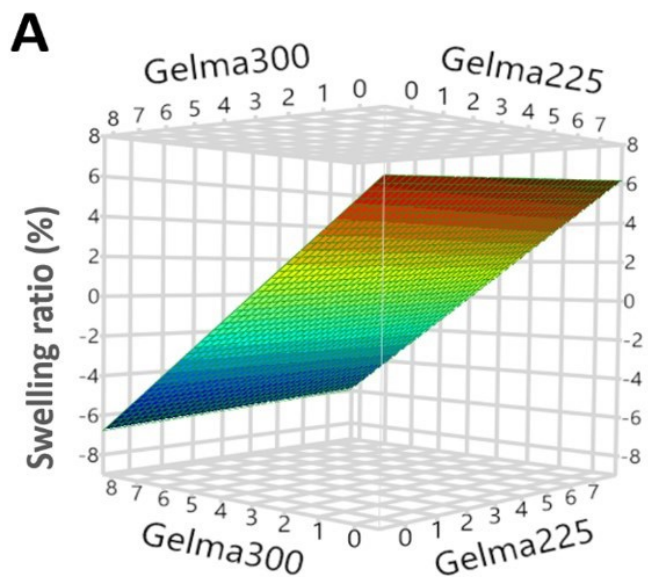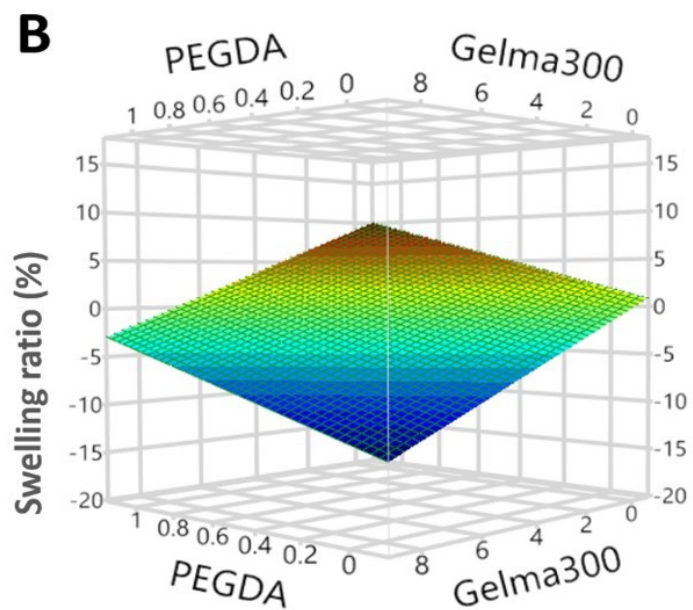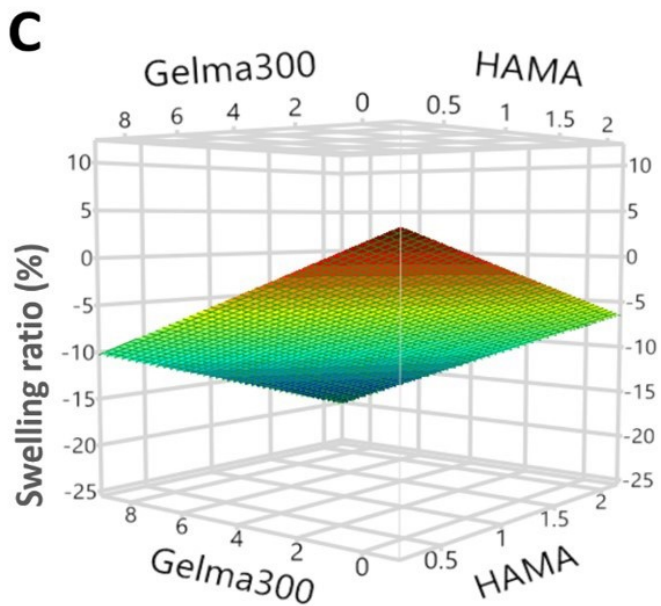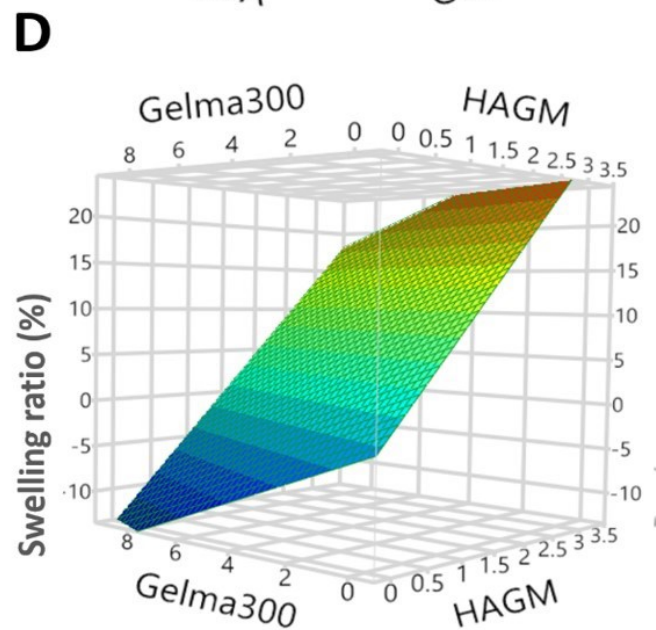

Supplement: d2bm01013e13.pdf [file d2bm01013e13.pdf]

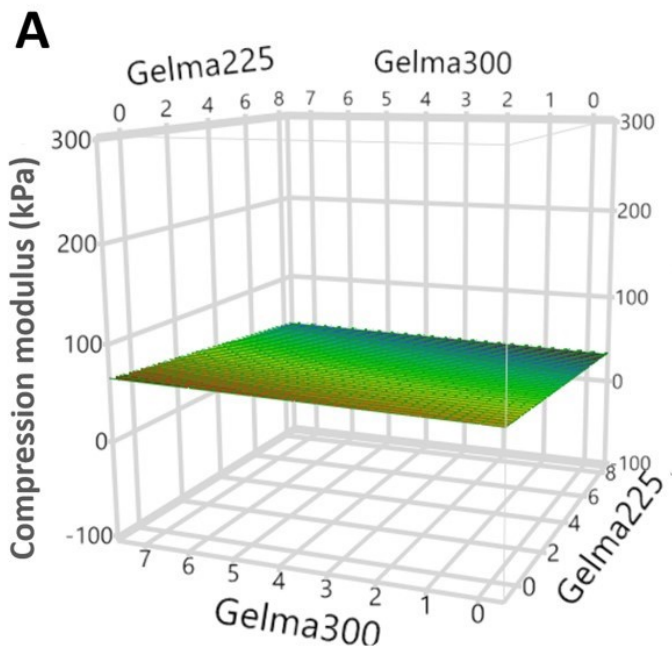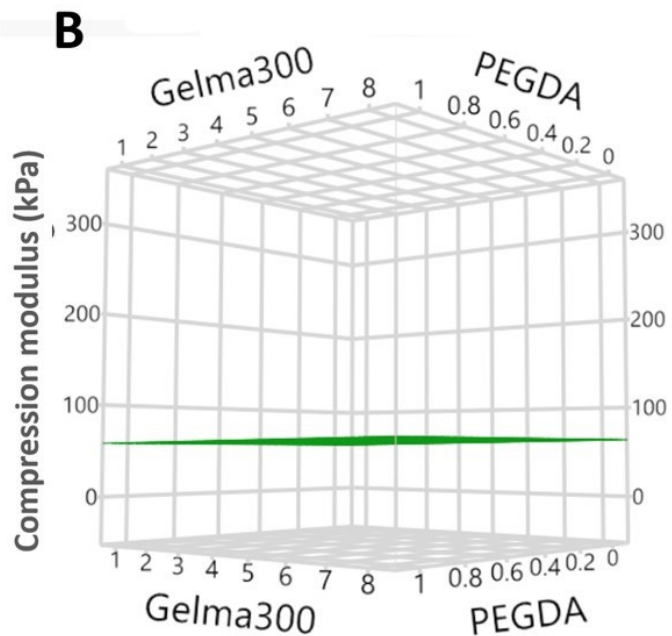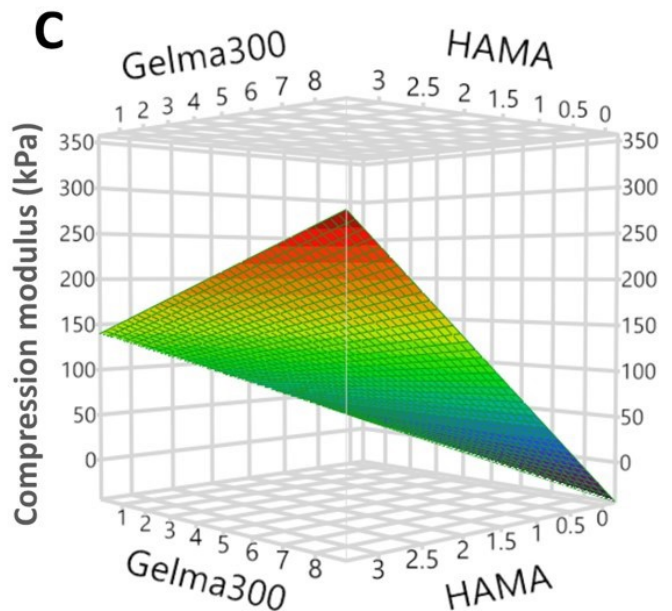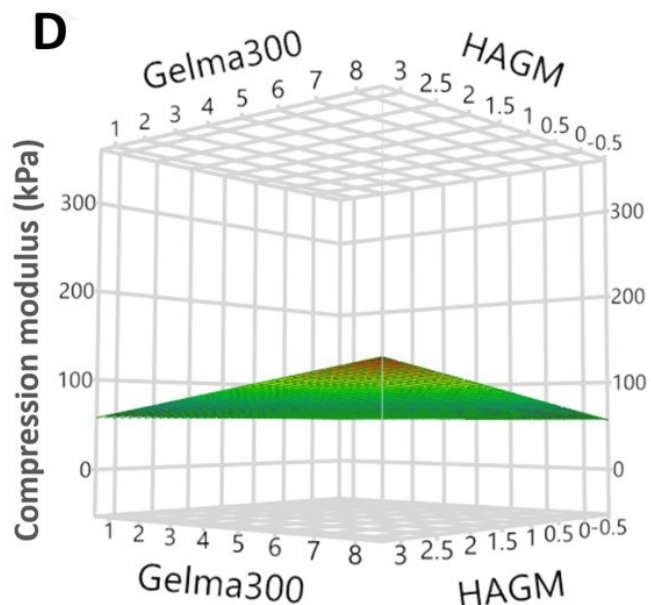

Supplement: d2bm01013e2.pdf [file d2bm01013e2.pdf]

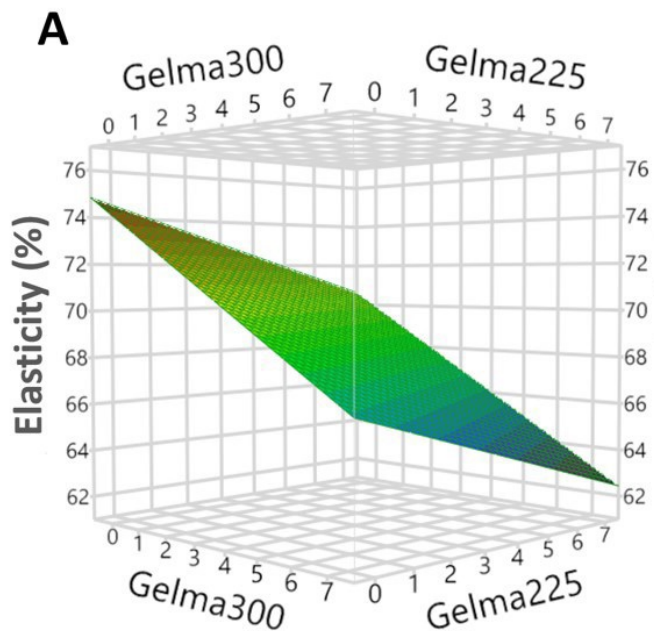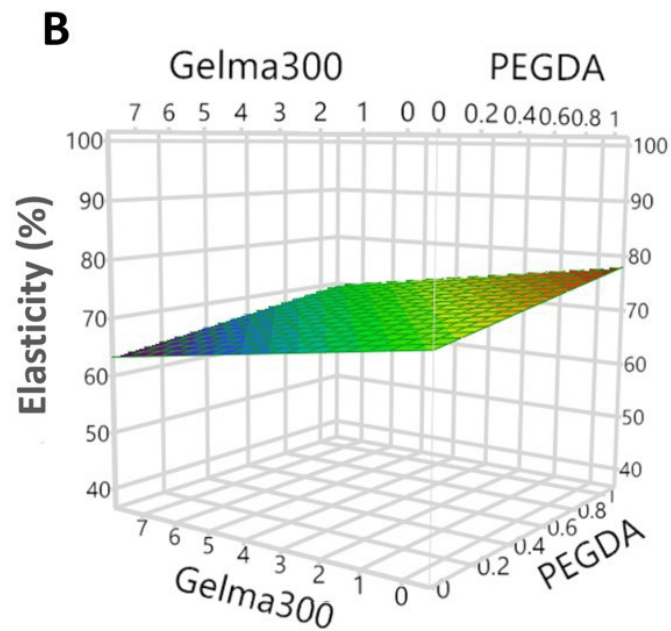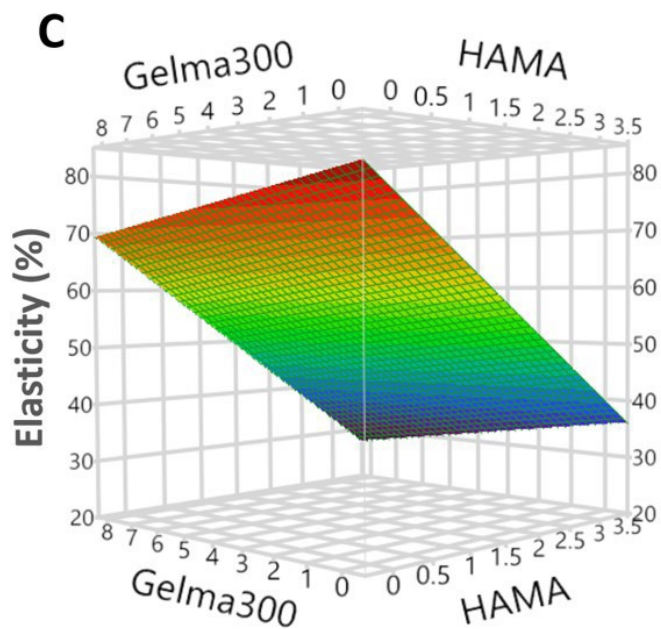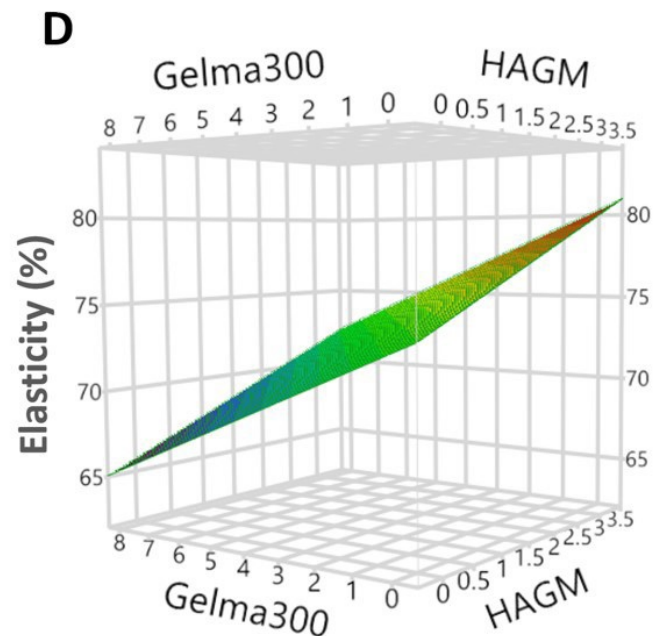

Supplement: d2bm01013e3.pdf [file d2bm01013e3.pdf]

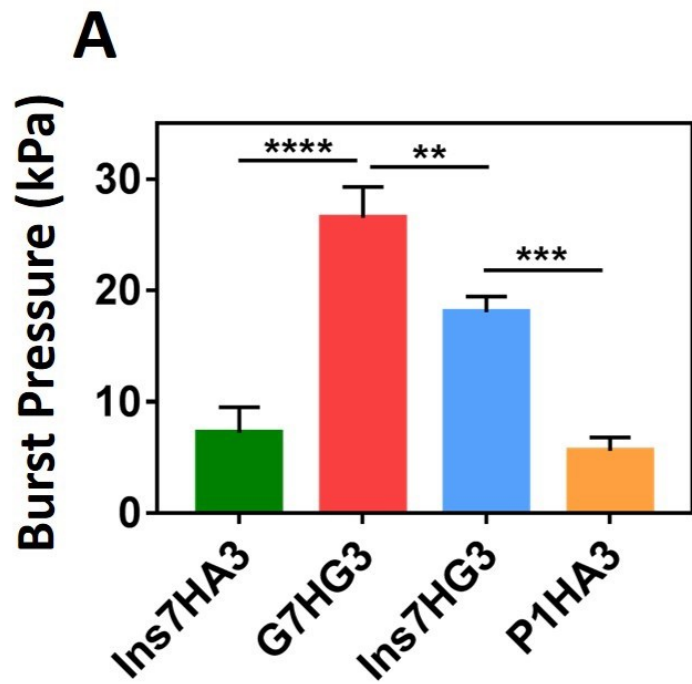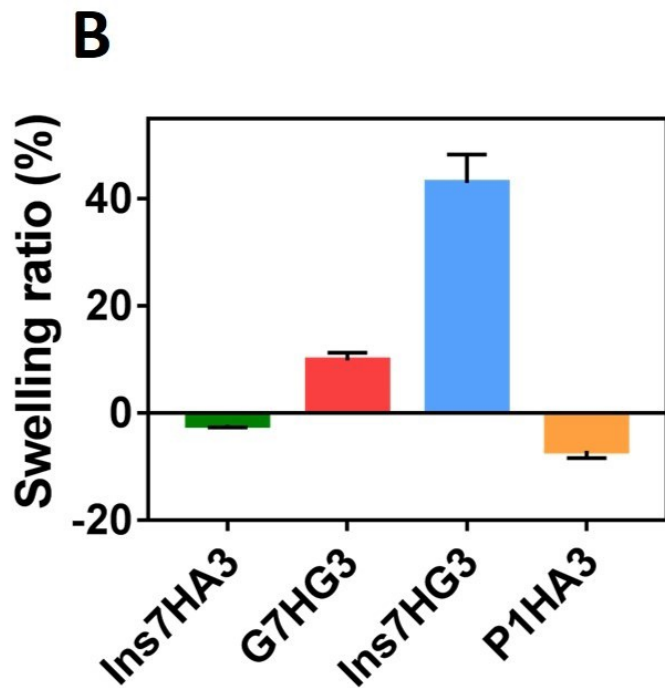

Supplement: d2bm01013e4.pdf [file d2bm01013e4.pdf]

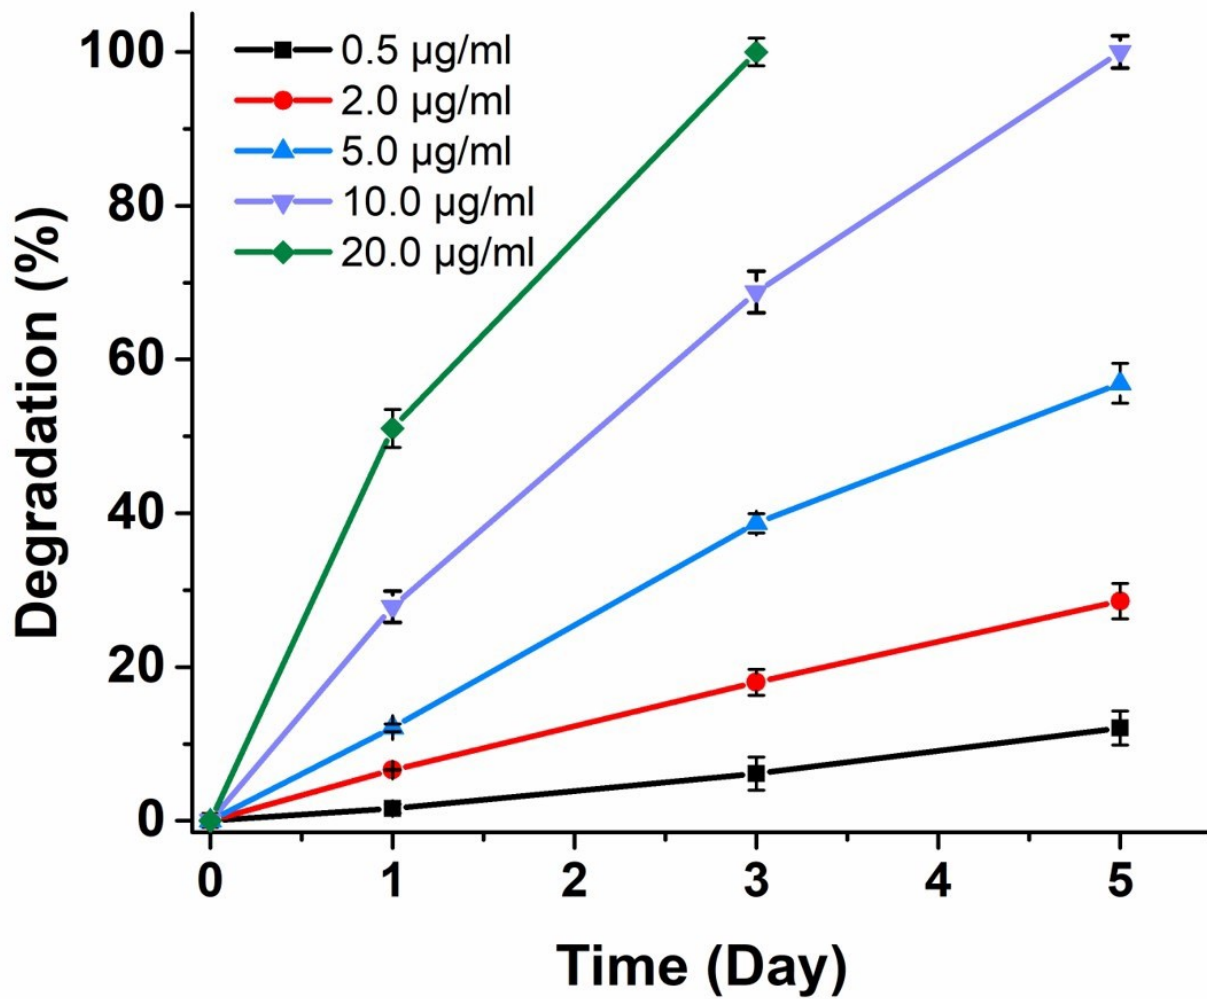

Supplement: d2bm01013e5.pdf [file d2bm01013e5.pdf]

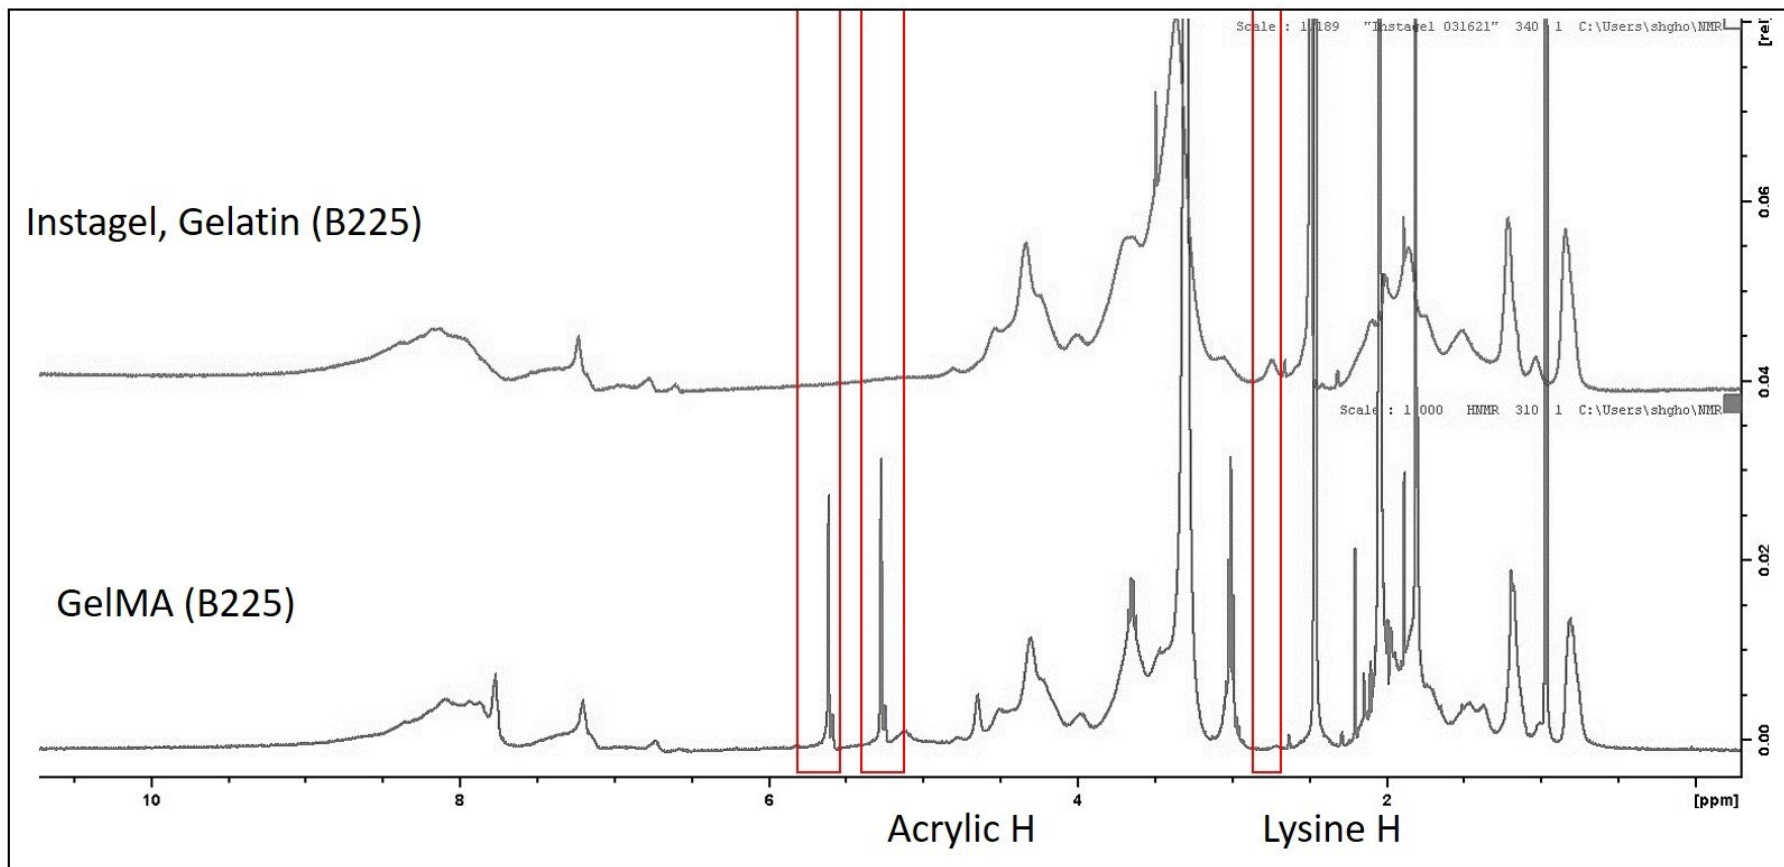

Supplement: d2bm01013e6.pdf [file d2bm01013e6.pdf]

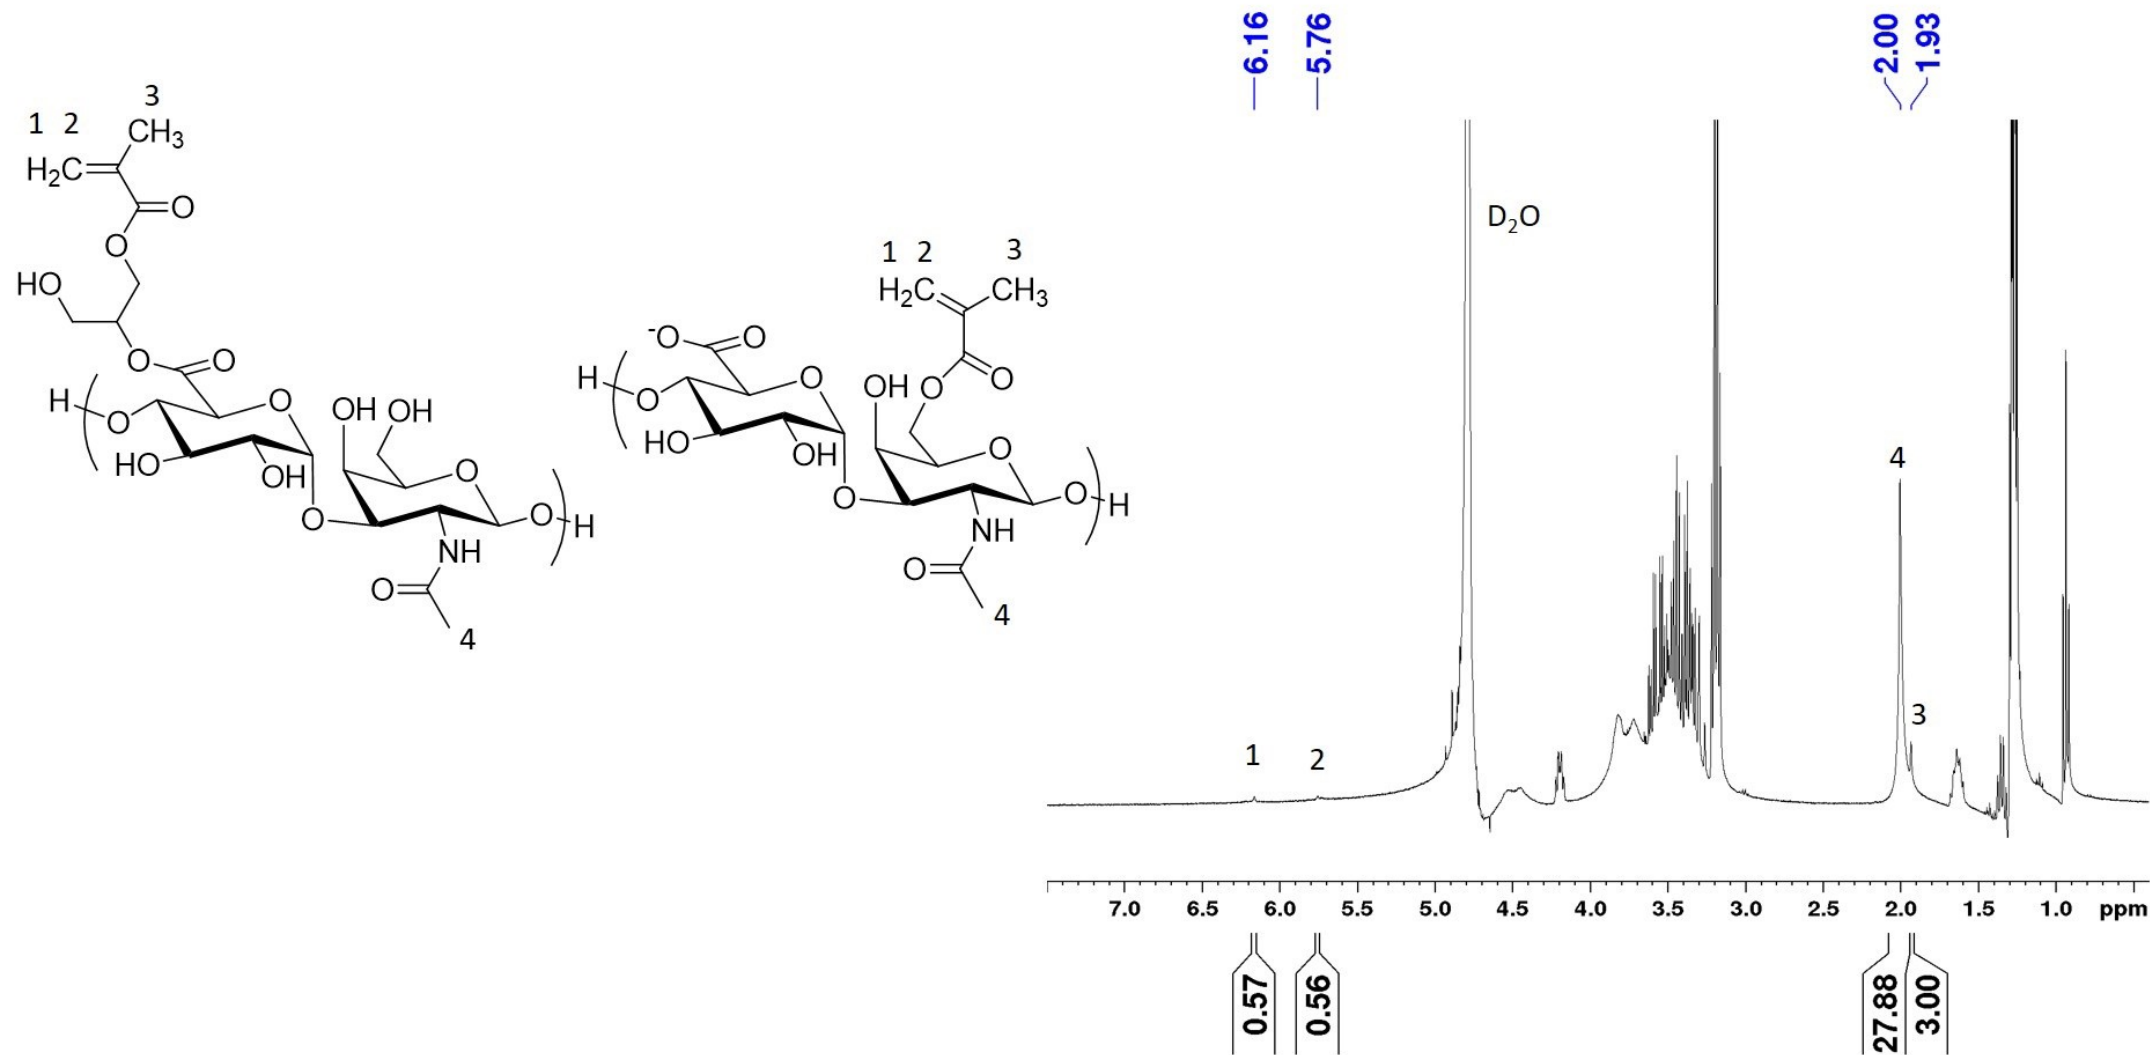

Supplement: d2bm01013e7.pdf [file d2bm01013e7.pdf]

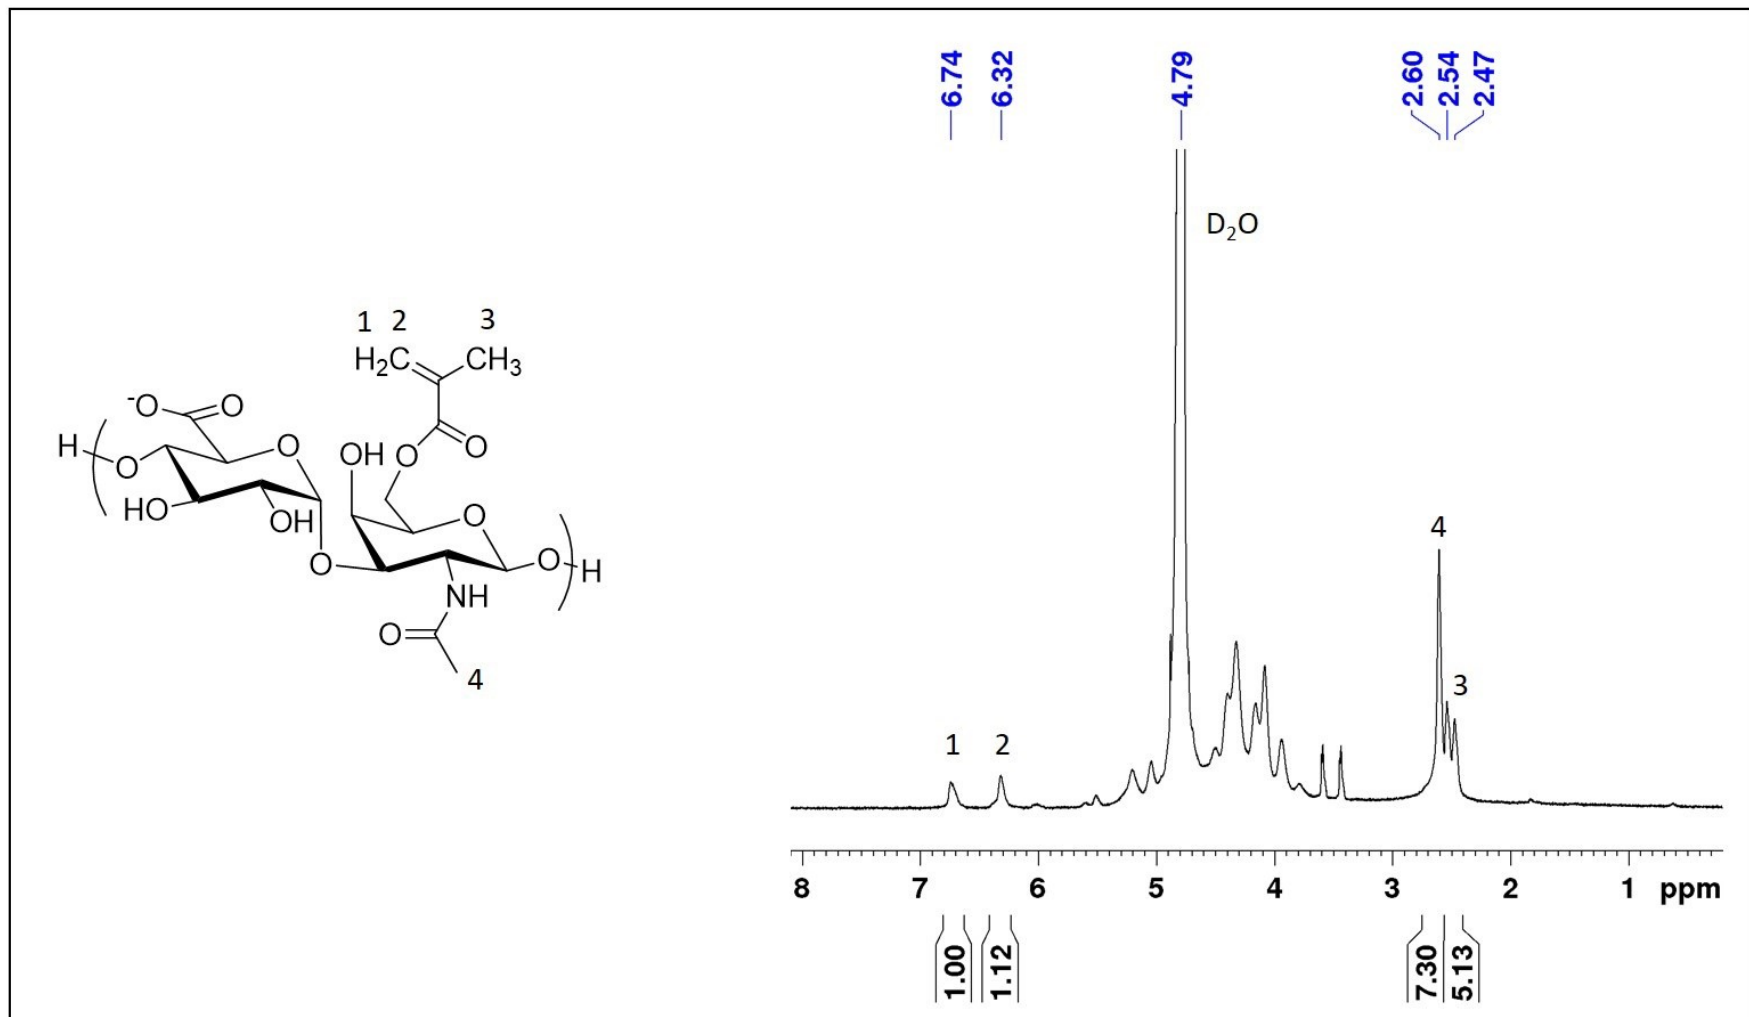

Supplement: d2bm01013e8.pdf [file d2bm01013e8.pdf]

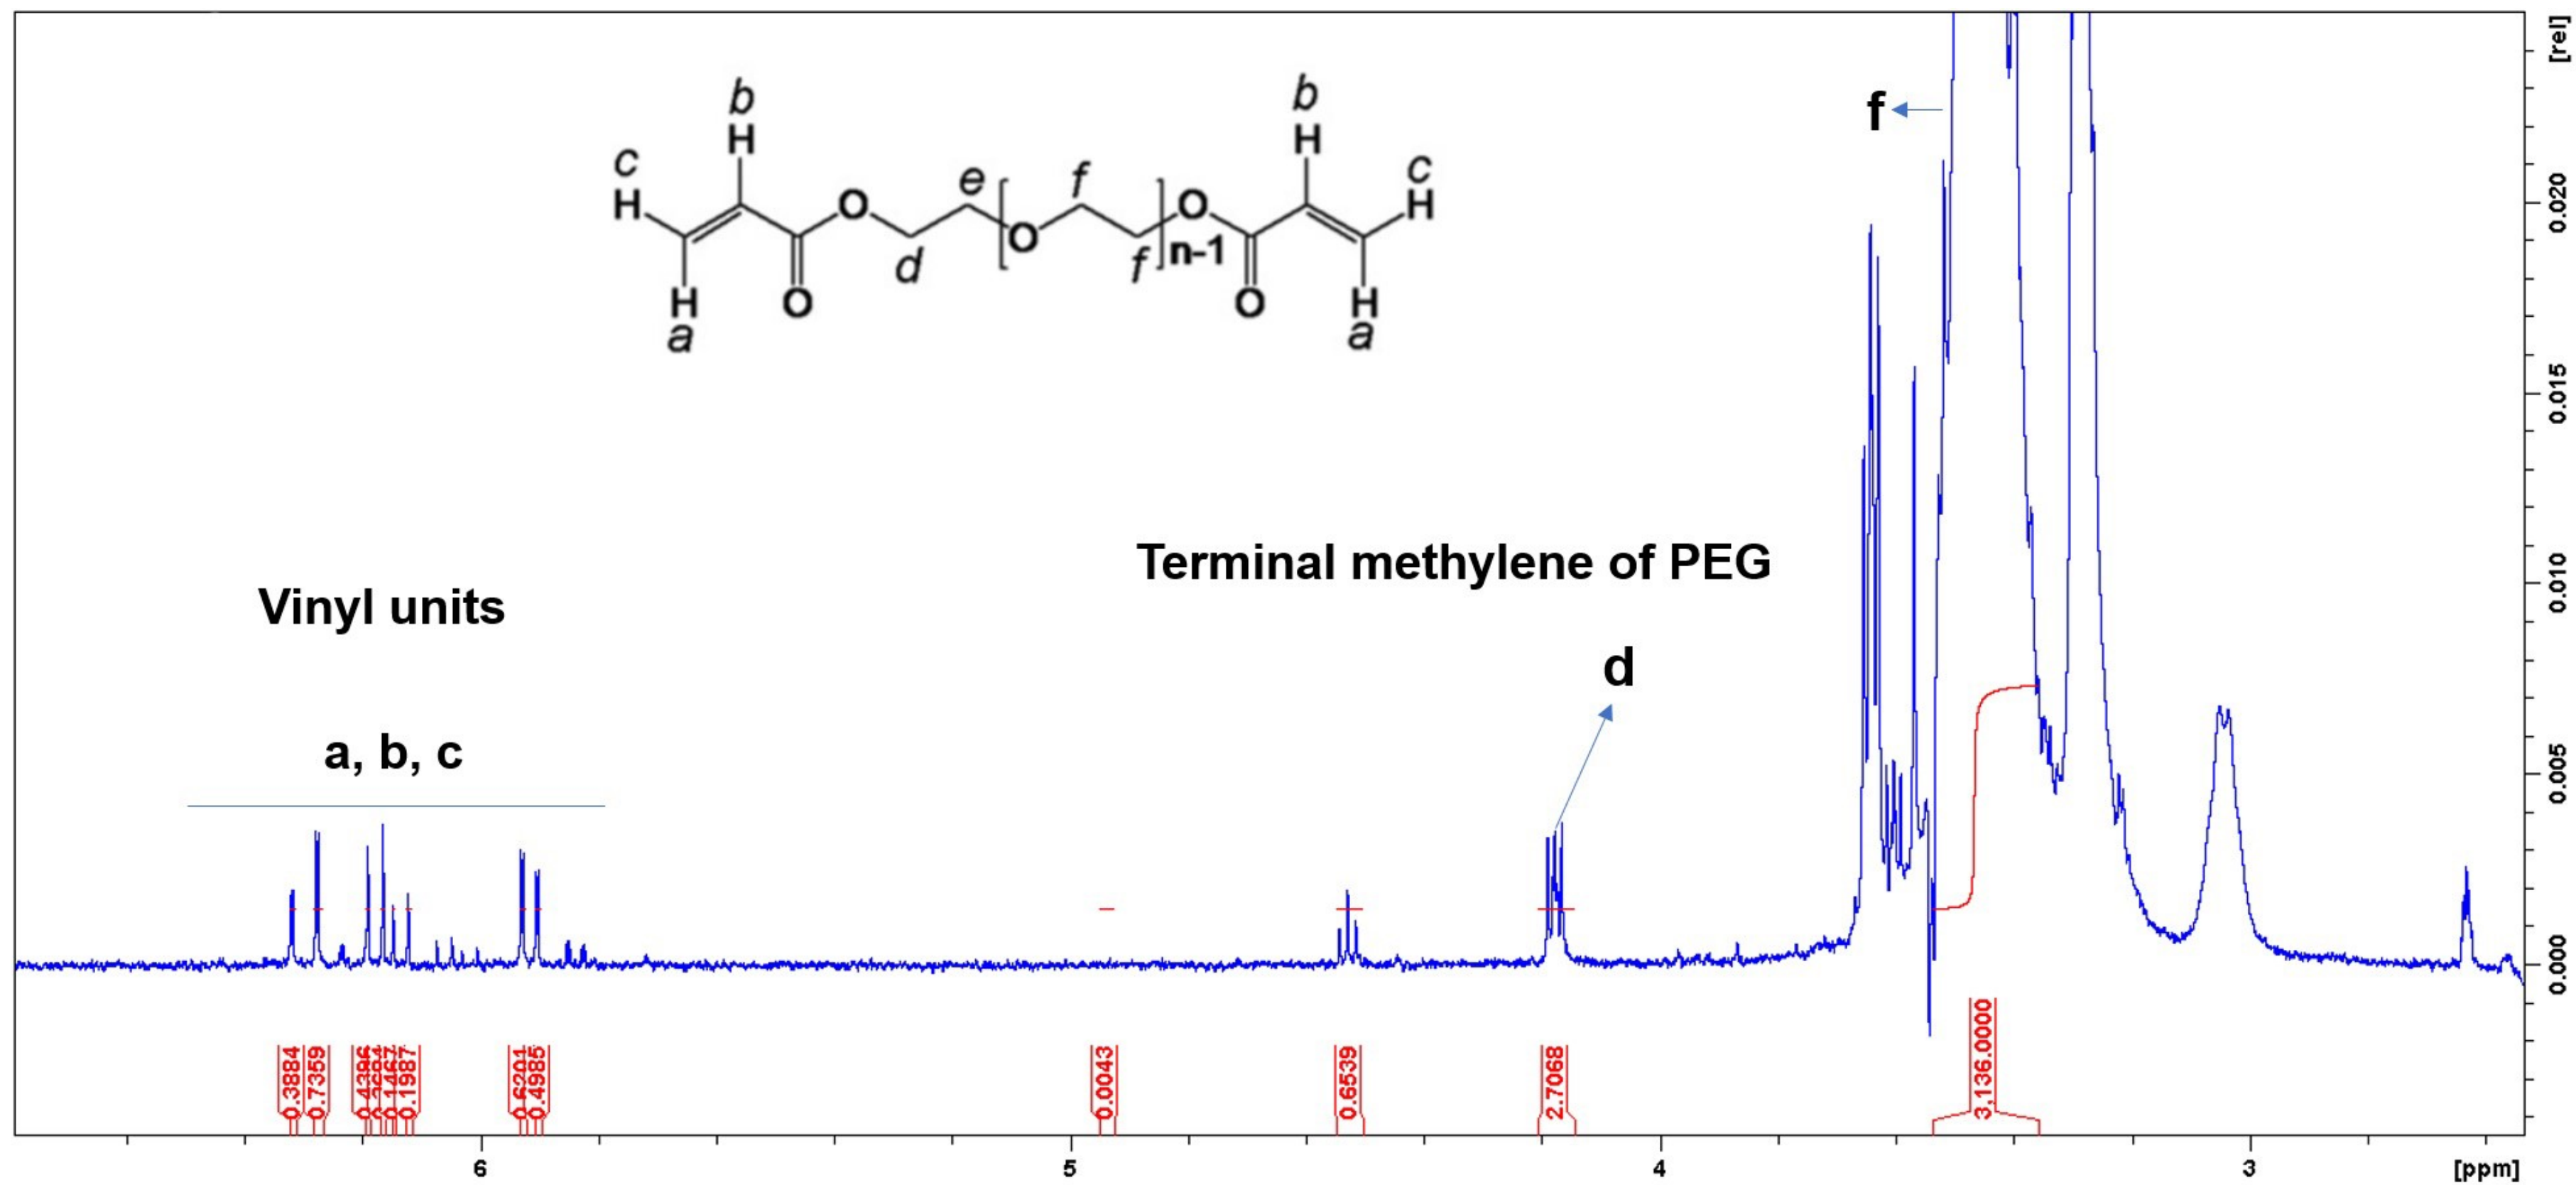

Supplement: d2bm01013e9.pdf [file d2bm01013e9.pdf]
